## RESEARCH ARTICLE

## Using low volume eDNA methods to sample pelagic marine animal assemblages

Michelle E. Dan<sup>1</sup>, Elan J. Portner<sup>1</sup>, Jeff S. Bowman<sup>1</sup>, Brice X. Semmens<sup>2</sup>, Sarah M. Owens<sup>3</sup>, Stephanie M. Greenwald<sup>3</sup>, C. Anela Choy<sup>1\*</sup>

**1** Integrative Oceanography Division, Scripps Institution of Oceanography, University of California San Diego, La Jolla, California, United States of America, **2** Marine Biology Research Division, Scripps Institution of Oceanography, University of California San Diego, La Jolla, California, United States of America, **3** Biosciences Division, Argonne National Laboratory, Lemont, Illinois, United States of America

\* [anela@ucsd.edu](mailto:anela@ucsd.edu)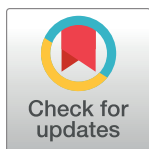

## OPEN ACCESS

**Citation:** Dan ME, Portner EJ, Bowman JS, Semmens BX, Owens SM, Greenwald SM, et al. (2024) Using low volume eDNA methods to sample pelagic marine animal assemblages. *PLoS ONE* 19(5): e0303263. <https://doi.org/10.1371/journal.pone.0303263>

**Editor:** Elena Gorokhova, Stockholm University, SWEDEN

**Received:** January 17, 2024

**Accepted:** April 23, 2024

**Published:** May 15, 2024

**Copyright:** © 2024 Dan et al. This is an open access article distributed under the terms of the [Creative Commons Attribution License](https://creativecommons.org/licenses/by/4.0/), which permits unrestricted use, distribution, and reproduction in any medium, provided the original author and source are credited.

**Data Availability Statement:** Sequencing data files can be accessed within the NCBI BioProject PRJNA1051569, at the URL <https://www.ncbi.nlm.nih.gov/bioproject/1051569>. All data frames and intermediary files used in the manuscripts are included in full as Supplementary Information ([S1 Dataset](#)).

**Funding:** This work was supported by funding from the National Science Foundation (NSF) to CAC (NSF OCE CAREER Award #2048210) and EJP (NSF PRF Award #2011031), the Office of Naval

## Abstract

Environmental DNA (eDNA) is an increasingly useful method for detecting pelagic animals in the ocean but typically requires large water volumes to sample diverse assemblages. Ship-based pelagic sampling programs that could implement eDNA methods generally have restrictive water budgets. Studies that quantify how eDNA methods perform on low water volumes in the ocean are limited, especially in deep-sea habitats with low animal biomass and poorly described species assemblages. Using 12S rRNA and COI gene primers, we quantified assemblages comprised of micronekton, coastal forage fishes, and zooplankton from low volume eDNA seawater samples ( $n = 436$ , 380–1800 mL) collected at depths of 0–2200 m in the southern California Current. We compared diversity in eDNA samples to concurrently collected pelagic trawl samples ( $n = 27$ ), detecting a higher diversity of vertebrate and invertebrate groups in the eDNA samples. Differences in assemblage composition could be explained by variability in size-selectivity among methods and DNA primer suitability across taxonomic groups. The number of reads and amplicon sequences variants (ASVs) did not vary substantially among shallow (<200 m) and deep samples (>600 m), but the proportion of invertebrate ASVs that could be assigned a species-level identification decreased with sampling depth. Using hierarchical clustering, we resolved horizontal and vertical variability in marine animal assemblages from samples characterized by a relatively low diversity of ecologically important species. Low volume eDNA samples will quantify greater taxonomic diversity as reference libraries, especially for deep-dwelling invertebrate species, continue to expand.

## Introduction

In pelagic ecosystems, community composition directly influences food web structure, biogeochemical cycling, and fisheries landings [1–3]. Monitoring marine animal communities over horizontal and vertical space thus aids in understanding variability in pelagic ecosystem structure and services. However, quantifying pelagic community composition often requires costly

Research (ONR) to JSB (ONR Award #N00014-21-1-2651), and the University of California Ship Funds Program to CAC. The funders had no role in study design, data collection and analysis, decision to publish, or preparation of the manuscript.

**Competing interests:** The authors have declared that no competing interests exist.

ship-based research operations and specialized oceanographic sampling gear [4,5]. Zooplankton and micronekton, comprising most of the animal biomass in pelagic systems [2,3], are commonly sampled with nets and quantifying their diversity requires life stage-specific taxonomic expertise across numerous phyla. Environmental DNA (eDNA) methods have immense potential to expand pelagic animal community sampling by reducing these operational constraints [6,7].

eDNA methods aim to sample the genetic material shed from organisms into their environment (e.g., skin, feces), which can be sequenced and matched to genetic reference libraries to simultaneously detect a range of taxa [6,8,9]. Collecting seawater samples instead of individual animals reduces sampling requirements and sequence-based methods can balance some of the shortcomings of using nets, which are size selective and poor samplers of highly mobile and soft-bodied gelatinous taxa [6,10,11]. Taxonomic assignment of genetic material relies on centralized reference libraries rather than dedicated morphological taxonomic expertise [12,13], and sequencing eDNA at multiple marker genes enables detection of animals spanning a large range of body sizes and types, as well as multiple life history stages [14,15]. When compared to biodiversity estimates using nets and visual surveys, eDNA methods generally detect higher diversity per unit effort but each represents distinct component assemblages of the overall community [16–19]. Although there appears to be agreement between read abundance and relative abundance within animal groups [13,20,21], variability in DNA shedding rates and primer biases among animal groups likely exacerbates variability in community composition estimates among methods [22,23]. As reference libraries expand across multiple markers [12,24,25], eDNA methods will better detect pelagic zooplankton and micronekton diversity and distributions [7,26,27].

Few studies have used eDNA to assess diversity in waters deeper than 200 m and clear methodological challenges are emerging (e.g., [28–30]). Animal diversity in the deep pelagic is poorly sampled relative to epipelagic diversity [15,31] and deep-pelagic taxa are likely under-represented in reference libraries relative to their shallow-water counterparts. Biomass in deep pelagic waters is generally low and eDNA densities are lower relative to shallow habitats [28,32]. While eDNA collection across depths can be maximized by filtering large volumes of seawater (2–60 L per sample, [28,33]), most pelagic sampling programs allocate water collections to a range of other routine chemical and biological measurements. Pelagic sampling programs that do not explicitly include eDNA collections within restrictive water budgets may have limited volumes remaining for eDNA analyses. For eDNA methods to be broadly useful for monitoring pelagic animal diversity and distributions, we need to examine how eDNA methods resolve diversity across taxonomic groups and habitat depths with a range of water volumes.

Our primary objective was to assess how eDNA samples collected from remaining unallocated water volumes reflect animal assemblage composition in the southern California Current Ecosystem (CCE). We used low volume water samples from the California Cooperative Oceanic Fisheries Investigations (CalCOFI) program—a long-running pelagic ecosystem monitoring program [34]—and collected water samples on an independent survey utilizing depth-discrete net samples in the deep pelagic. We investigate: *i*) the differences between assemblages detected by low volume eDNA and net-based morphological methods, *ii*) the ability of low volume eDNA methods to identify diverse taxonomic groups across shallow and deep habitats and *iii*) whether opportunistic, low volume eDNA samples can describe animal assemblage biogeography in the CCE. We also discuss how low volume eDNA samples could be optimized to provide a broader picture of pelagic animal diversity.

## Materials and methods

### Field sampling

Sampling was performed within the southern California Current ecosystem on two independent research cruises. eDNA samples were collected on the Fall 2021 CalCOFI survey aboard R/V *Sally Ride* (SR2111: October 31–November 14, 2021; 33 total stations, Fig 1 and Table 1). eDNA collection (seven stations) and Multiple Opening/Closing Net and Environmental Sensing System tows (MOCNESS, three stations) were conducted on an independent survey aboard the R/V *Roger Revelle* (RR2104: June 15–27, 2021). No field permits were required for the collections in this study.

Seawater was collected at each station using 10 L Niskin bottles affixed to a rosette sampler equipped with a conductivity, temperature, and depth (CTD) sensor package (SeaBird Electronics). Following allocation to other analyses, seawater volumes ranging from 360–1800 mL were transferred into sterilized four-liter carboy containers for eDNA analyses from up to 24

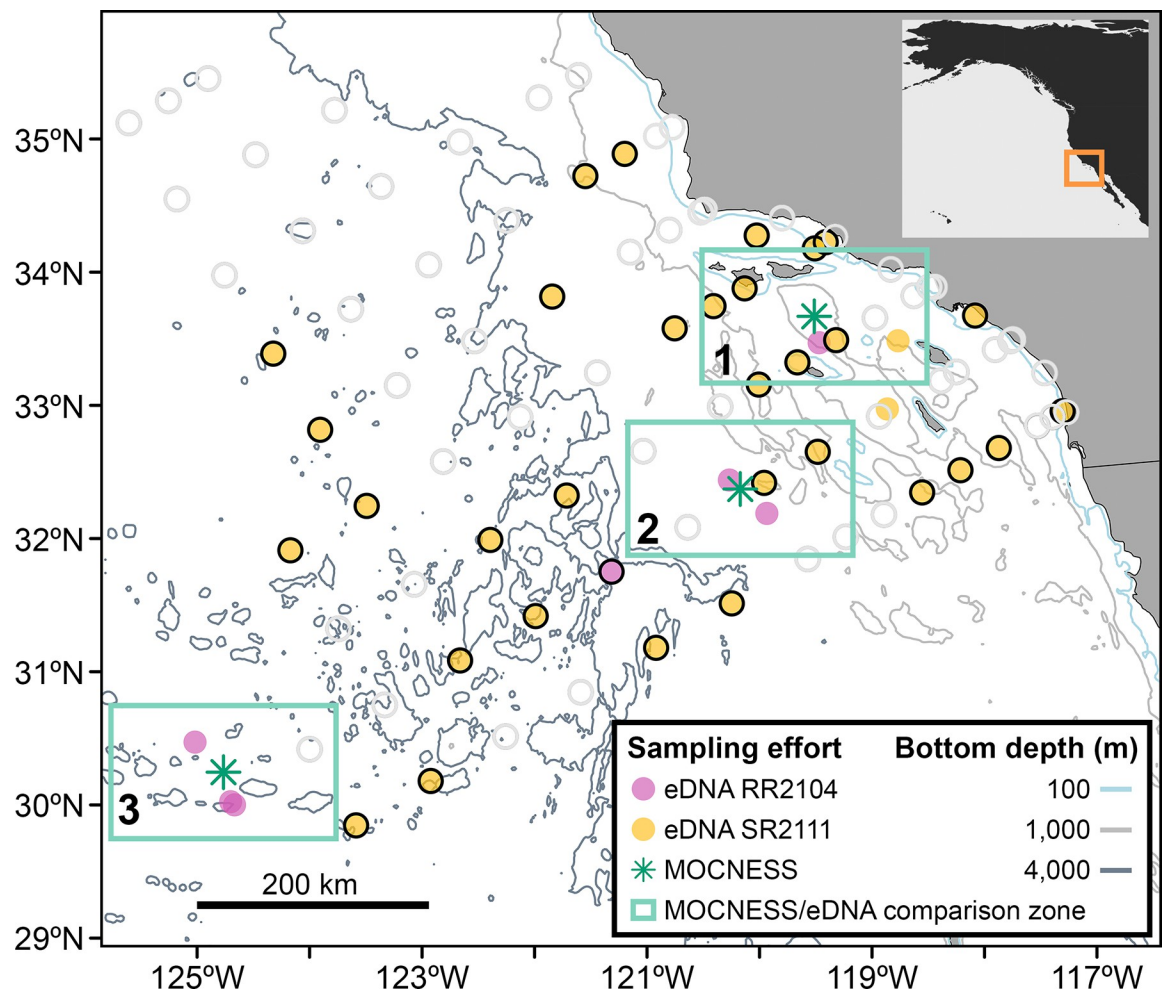

**Fig 1. Sampling locations for eDNA collection and MOCNESS tows.** eDNA sampling (closed circles) and MOCNESS tows (green asterisks) were performed within the Southern California Current Ecosystem, mostly at designated CalCOFI stations (open circles). MOCNESS tows were conducted at three stations representing distinct pelagic habitats. Three zones (numbered within each green square) are indicated where eDNA samples were collected in proximity to MOCNESS samples. Within these three zones, we compared animal assemblage diversity between sampling methods. Map includes bathymetry data from NOAA National Centers for Environmental Information [35] and coastline data from Natural Earth; all data are in the public domain.

<https://doi.org/10.1371/journal.pone.0303263.g001>

**Table 1. Sampling location, depth, and volume for eDNA samples and MOCNESS trawls.**

| Method:<br>Zone    | Latitude (°N)<br>range (median) | Longitude (°W)<br>range (median) | Distance from<br>coast (km)<br>range (median) | Environmental samples<br>(controls) | Depth (m)<br>range (median) | Volume filtered (mL) range (median) |
|--------------------|---------------------------------|----------------------------------|-----------------------------------------------|-------------------------------------|-----------------------------|-------------------------------------|
| eDNA:<br>total     | 29.8–34.9 (32.6)                | -125.0 -- -117.3<br>(-120.2)     | 109.5–753.5 (276.7)                           | 436<br>(11)                         | 1.0–2200.0 (100.4)          | 360–1800 (1000)                     |
| eDNA:<br>Zone 1    | 32.7–34.3 (33.6)                | -120.8 -- -117.9<br>(-119.7)     | 109.5–240.0 (182.9)                           | 121<br>(1)                          | 1.0–1500.0 (70.0)           | 600–1800 (990)                      |
| eDNA:<br>Zone 2    | 31.4–33.0 (32.4)                | -122.0 -- -118.2<br>(-119.5)     | 233.1–501.2 (282.9)                           | 137<br>(2)                          | 1.8–1600.0 (120.9)          | 360–1800 (990)                      |
| eDNA:<br>Zone 3    | 29.8–30.5 (30.0)                | -125.0 -- -122.9<br>(-124.7)     | 662.2–753.5 (723.0)                           | 39<br>(2)                           | 2.0–2200.0 (175.0)          | 650–1800 (1560)                     |
| MOCNESS:<br>Zone 1 | 33.6–33.8 (33.7)                | -119.7 -- -119.4<br>(-119.5)     | 156.2–180.2 (168.3)                           | 16                                  | 4.2–1749.1 (382.4–696.4)    | -                                   |
| MOCNESS:<br>Zone 2 | 32.2–32.6<br>(32.3)             | -120.3 -- -119.9<br>(-120.2)     | 308.8–339.3 (326.2)                           | 6                                   | 0.9–1001.6 (199.7–398.4)    | -                                   |
| MOCNESS:<br>Zone 3 | 30.1–30.5 (30.3)                | -125 -- -124.6<br>(-124.8)       | 715.9–755.8 (729.5)                           | 5                                   | 12.5–718.6 (26–497.1)       | -                                   |

Zones correspond to the numbered boxes in Fig 1. MOCNESS data reflect all nets that are used in comparison with co-located eDNA samples.

<https://doi.org/10.1371/journal.pone.0303263.t001>

different depths per CTD cast (1–2200 m). Carboys were stored at 4°C in the dark until the seawater was filtered for eDNA analyses. Between uses, carboys were rinsed three times with purified MilliQ water, filled with 400–800 mL of 10% hydrochloric acid, and soaked for at least one hour. To distribute acid over the entire inner surface, carboys were shaken vigorously before and after soaking. Finally, the carboys were rinsed three more times with MilliQ water. Seawater was filtered through a 0.2-µm Supor membrane disc filter (47-mm diameter, Pall Corporation, Port Washington, NY, USA) supported on a 500 mL steel funnel attached to a WaterVac vacuum pump (Sterlitech, Auburn, Washington, USA). The filtration setup was cleaned between samples by rinsing with ~50 mL of 95% ethanol followed by ~100 mL of MilliQ water, and the funnel was cleaned twice following the same protocol between CTD casts. Forceps were thoroughly rinsed with 95% ethanol then MilliQ water between eDNA filter samples. MilliQ water was filtered alongside each CTD cast on RR2104 and on four CTD casts on SR2111, serving as eDNA-free negative controls. Filters were placed in sterile 15-mL tubes and stored at -80°C until DNA extraction.

MOCNESS trawls (10 m<sup>2</sup> mouth area with five depth-discrete nets) were used to sample zooplankton and micronekton from up to five depth layers per trawl (0–1750 m deep) as described in Choy et al. [36]. Briefly, net-collected organisms were identified to the most-specific taxonomic level possible based on morphological characteristics described in published keys. Organisms were then enumerated for each taxonomic group (full dataset to be published elsewhere). The sampling of marine species with MOCNESS trawls was reviewed and approved by the University of California San Diego's Institutional Animal Care and Use Committee (AAALAC Accreditation #000503) under protocol S21126 to C.A. Choy.

### eDNA extraction, amplification, and sequencing

eDNA filters were sectioned into quarters prior to extraction to maintain source material for future work. DNA was extracted from one quarter of a filter per sample using a KingFisher™ Flex Purification System and MagMAX Microbiome Ultra Nucleic Acid Isolation Kit (ThermoFisher Scientific, Waltham, Massachusetts, United States). To maximize broad detection of animals while minimizing the number of primers applied, we selected mitochondrial 12S

ribosomal RNA (12S) and cytochrome oxidase subunit I (COI) genes as barcode regions. Both barcode regions have large reference libraries and effectively identify a broad diversity of invertebrates and vertebrates, respectively [23,32,37–39]. We applied 12S-V5 primers amplifying a 73–110 bp fragment of the 12S gene [40] and the mlCOIintF and jgHCO2198 primers amplifying a 313 bp fragment of the animal COI gene [41]. Primer sequences, PCR reaction recipes, and PCR cycle conditions are given in the Supplementary Information (Methods). Amplicon libraries were sequenced via paired end sequencing (2 X 150bp for 12S and 2 X 300bp for COI) on Illumina's MiSeq platform at The Environmental Sample Preparation and Sequencing Facility at Argonne National Laboratory.

### Bioinformatics pipeline

Reads were filtered, denoised, and merged in the *dada2* pipeline version 1.26.0 [42]. Default parameters were used except with the 'filterAndTrim' command, where trimLeft was set to 15 and truncLen set to 136 for 12S and 225 for COI. Samples represented by fewer than 1,000 reads after being run through the *dada2* pipeline were considered to have been unsuccessfully sequenced and removed from the 12S and COI datasets prior to analyses. The resulting unique amplicon sequence variants (ASVs) were classified in *dada2* against publicly available sequence reference libraries for 12S (*MIDORI2* [43]) and COI (*MetaZooGene* [12]). ASVs matching to taxa that do not occur in marine habitats likely represent contamination or misclassification and were removed from our datasets prior to analyses. ASVs matched to Primates (i.e., human sequences), Galliformes, Rodentia, Bovidae, Suidae, Chiroptera, and Cypriniformes were removed from the 12S dataset. COI reads matching to the bivalves *Bathymodiolus japonicus*, *Saccostrea malabonensis*, and *Abyssogena phaseoliformis* were observed in relatively high numbers in most samples and controls. These taxa, not known from our study, were considered contamination and removed from the COI dataset. All vertebrate sequences, which accounted for less than 3% of decontaminated ASVs, were also removed from COI the dataset because 12S primers are more effective at identifying vertebrate eDNA [32]. To minimize the potential impacts of cross-contamination on our results, all ASVs identified in the negative controls were removed from the environmental samples from each cruise prior to analyses following Govindarajan et al. [44].

### Standardizing eDNA and MOCNESS data

To assess variability in the assemblages detected by eDNA and MOCNESS methods, we standardized the spatial and taxonomic resolutions across methods. We accounted for horizontal and vertical variability in sampling effort between methods by grouping eDNA samples collected within the vicinity of the MOCNESS tows and binning eDNA samples by collection depth to match MOCNESS sampling depths. eDNA samples collected within one degree latitude and two degrees longitude of each MOCNESS sampling site were assigned to the same sampling "zone" (Fig 1). Within each zone, eDNA and MOCNESS samples were assigned to shallow (0–200 m) or deep (200–1750 m) depth bins.

We standardized taxonomic identifications and classifications using the most-specific taxonomic resolution shared between methods. Vertebrate taxonomic identifications were grouped at the order level, except for orders *incertae sedis* within Ovalentaria and Eupercaria which were grouped at the series level [45]. The taxonomic resolution of invertebrate identifications was more variable and invertebrate taxa were binned into broad, mutually exclusive animal groups including phyla and suborders (Fig 3B). Hereafter the term "taxonomic group" is used to refer to these mutually exclusive animal classifications in the eDNA and MOCNESS datasets.

Animal communities are generally quantified using the abundances or biomass of each taxon (e.g., [4]). However, the methods we used do not share a comparable metric of abundance due to numerous issues with connecting ASV read counts to animal abundances across diverse taxa (e.g., variable gene copy numbers [46], differences in eDNA shedding rates [22], primer biases [23,37], and PCR biases [47]). Thus, we quantified presence-based community composition as the “proportional occurrence” of each taxonomic group per sample. For the MOCNESS data, proportional occurrence was quantified as the number of taxa present within each taxonomic group divided by the total number of taxa per sample. For the eDNA data, proportional occurrence was calculated as the number of ASV presences for each taxonomic group divided by the total number of ASVs per sample. This metric reflects variability in the proportional taxonomic richness of each taxonomic group among sampling methods.

### eDNA and MOCNESS data comparisons

To quantify the correlation between assemblages sampled by eDNA and MOCNESS we performed a Mantel test on Morisita-Horn dissimilarities [48] of proportional occurrences among samples using *vegan* (version 2.6–4 [49]) in R. Each unique combination of method, zone, and depth bin contained samples collected during both day and night, but we did not have enough MOCNESS samples to examine temporal variability in the correlation among methods. We present average proportional occurrences ( $\pm$  SD) for each taxonomic group across all zones and depths to provide a standardized summary of the richness sampled by each method.

### eDNA sample variability across the deep pelagic

To understand how the characteristics of eDNA samples vary with depth, we quantified the sample volume-corrected DNA concentration in each sample (measured DNA concentration \* (1000 mL/seawater sample volume)). For samples with more than 1,000 reads, we quantified read counts and total ASVs per mL for each primer in each sample. We also calculated the proportion of ASVs assigned to species per sample to determine whether the libraries we used provided variable match probabilities across depths. eDNA sampling density was disproportionately high at depths shallower than 200 m (67% of samples), and samples were binned into three depth groups (0–200 m, 200–600 m, >600 m) to simplify comparisons across our skewed sampling depths. These depth groups reflect ecological variability in our study area, where 200 m and 600 m approximate boundaries of the daytime and nighttime deep scattering layers [50]. When data were non-normal but homoscedastic among depth groups, the effect of depth group on each eDNA metric was examined using a Kruskal-Wallis test. When data were non-normal and heteroscedastic, a Welch’s ANOVA on ranks was used [51,52]. For significant Welch’s ANOVA tests, pairwise comparisons among groups were made using Games-Howell tests on ranks [53].

### Linking ASV diversity to species diversity

In the absence of species-level ASV identifications, many metabarcoding studies examine assemblage composition at the ASV level [19,21,54], but it is not clear how communities of ASVs reflect taxonomic assemblages. If species are commonly represented by multiple ASVs, ASV-level richness would overestimate taxonomic richness and could distort interpretations of spatiotemporal variability in assemblage composition. We examined the relationship between ASV and species diversity by quantifying the number of ASVs assigned to each species per taxonomic group for both primers. The mean number ( $\pm$  SD) of ASVs assigned to each species is reported for each taxonomic group.

## eDNA-based assemblage biogeography

To examine how taxa sampled with eDNA are associated across horizontal and vertical space, we performed hierarchical clustering analysis on the 12S and COI datasets separately. For both primers, only ASVs identified to the species level were included in the clustering analyses to ensure all taxonomic assignments were mutually exclusive. To minimize the influence of poorly sampled species on informative clustering, species present in fewer than three samples were excluded from both the 12S and COI datasets [55]. Mammal and bird ASVs were removed from the 12S dataset to focus on assemblages comprised of zooplankton, micronekton, and coastal forage fishes [56]. To minimize the potential impacts of species that undertake diel vertical migration on our ability to distinguish variability in community compositions across depths [19,29], we limited cluster analyses to eDNA samples collected at night, defined as the period from 90 minutes after sunset to 90 minutes before sunrise.

Presences/absences were assigned to each species and clustering was performed on Jaccard dissimilarities among samples using Ward's minimum variance criterion [57] in the *stats* package (version 4.2.2 [58]) in R. Up to 10 of the most frequently occurring species per cluster were used to visualize the core community composition in each cluster. To assess the separation distance, or cohesiveness, between resulting clusters, we performed silhouette analysis and quantified the total within-group sum of squares using the *factoextra* package (version 1.0.7 [59]). We used the elbow method on both metrics of separation distance to select an "optimal" number of clusters that provided a parsimonious but informative level of sample partitioning.

Species diversity in each cluster was quantified with species accumulation curves using a random accumulator method in *vegan* (version 2.6–4 [49]) in R. To better understand taxonomic diversity within clusters, we also quantified the average number of species per sample and frequency of occurrence of each species per cluster. Clusters with average silhouette widths  $\geq 0.1$  and containing fewer than 15% of samples with negative silhouette widths were considered adequately cohesive and retained in the analysis [60]. We visualized the core geographic distributions of the species assemblages represented in each cluster by mapping the 50% probability density contours of the samples within "shallow" (0–120 m) and "deep" depth bins (121–565 m for 12S; 0–120 m and 121–900 m for COI). Depth bins were selected to depict similar numbers of samples in shallow and deep bins (S1 Fig in [S1 File](#)).

## Results

### Overview of animal biodiversity detected by eDNA and MOCNESS methods

A total of 436 eDNA samples from 40 CTD casts and 11 negative controls were extracted and sequenced using 12S and COI primers ([Table 1](#)). DNA concentrations averaged  $2.76 \text{ ng } \mu\text{l}^{-1}$  ( $\text{SD} = 3.05 \text{ ng } \mu\text{l}^{-1}$ ) for environmental samples and were below detection for all negative controls except two at  $0.08 \text{ ng } \mu\text{l}^{-1}$  ([S1 Dataset](#)). Three environmental samples had DNA concentrations below detection levels and were excluded from the analyses. Following the denoising and filtering protocols described in the methods, 231 12S samples (54%) and 331 COI samples (79%) had more than 1,000 reads and were included in our analyses. The mean reads per sample was 24,333 in our 12S dataset and 31,611 in our COI dataset ([Table 2](#)). Restricting reads to only marine taxa relevant to the study area resulted in 245 12S ASVs comprising 868,818 reads and 7,971 COI ASVs comprising 616,621 ([Table 2](#)). The negative controls contained 235,606 reads of 36 12S ASVs and 128,836 reads of 3,757 COI ASVs ([Table 2](#)). However, all ASVs that accounted for  $>1\%$  of the total read abundance in the negative controls could not be assigned

**Table 2. Summary of sampling characteristics for eDNA sequencing and MOCNESS trawls.**

|                                                                       | 12S             |                 | COI             |                 |
|-----------------------------------------------------------------------|-----------------|-----------------|-----------------|-----------------|
|                                                                       | eDNA            | Control         | eDNA            | Control         |
| <i>Number of samples</i>                                              | 428             | 11              | 419             | 8               |
| <i>Total reads after dada2 analysis</i>                               | 7,887,854       | 235,606         | 11,039,083      | 128,836         |
| <i>Average number of reads per sample (± SD)</i>                      | 24,333 ± 17,443 | 21,419 ± 24,824 | 31,611 ± 20,814 | 21,441 ± 15,566 |
| <i>Total ASVs</i>                                                     | 1,322           | 36              | 174,156         | 3,757           |
| <i>Total target marine animal reads</i>                               | 868,818         | 1,830           | 616,621         | 18,085*         |
| <i>Average number of target marine animal reads per sample (± SD)</i> | 3,761 ± 4,709   | 166 ± 454       | 1,964 ± 2,966   | 3,014 ± 6,914*  |
| <i>ASVs belonging to target marine animals</i>                        | 245             | 7               | 7,971           | 299             |
| MOCNESS                                                               |                 |                 |                 |                 |
|                                                                       | Vertebrates     | Invertebrates   |                 |                 |
| <i>Number of samples</i>                                              | 27              | 27              |                 |                 |
| <i>Total unique taxa</i>                                              | 68              | 153             |                 |                 |

\* A single negative control contained 17,121 reads (95% of the COI negative control reads). The mean number of reads in the remaining seven COI negative controls is  $193 \pm 247$ .

<https://doi.org/10.1371/journal.pone.0303263.t002>

any taxonomy by our bioinformatics pipeline and most of the ASVs (80% of 12S, 91% of COI) and reads (99% of 12S, 86% of COI) present in the negative controls were from non-target taxa or could not be assigned any taxonomy. Seven 12S ASVs and 299 COI ASVs from target marine taxa were present in the negative controls (Table 2). These ASVs represented 732,559 and 78,885 reads in the 12S and COI environmental samples, respectively, and were removed prior to analyses.

In the 12S dataset, 81 “unique taxa” (unique ASV identifications at any taxonomic level) were identified from 26 taxonomic orders including 58 taxa identified to the species level (Fig 2 and S1 Table in S1 File). Of the taxa identified to the species level, there were 48 fishes, eight mammals, one hemichordate, and one bird. Clupeiformes accounted for the most reads (28% of total), as well as 15% of ASVs and 6% of unique taxa. Myctophiformes accounted for 23% of reads, 21% of ASVs, and had the most unique taxa of any group (16% of total). The 12S dataset identified fewer unique taxa than the COI dataset but generally resolved diversity at a finer taxonomic level with reads spread more evenly across taxonomic groups (S1 Table in S1 File). In the COI dataset, 126 unique taxa were identified including 35 taxonomic orders represented by 102 taxa identified to the species level (Fig 2, S1 Table in S1 File). Among the taxa identified to species, there were 35 Cnidarians, 29 Crustaceans, and 28 Polychaetes. Copepoda was the most dominant group, accounting for 65% of reads, 58% of ASVs, and 20% of unique taxa. Polychaeta had the most unique taxa of any group, accounting for only 2% of reads and 5% of ASVs, but 26% of unique taxa.

A total of 27 MOCNESS net samples were included in the methods comparison (Table 1). Sixty-eight species from 17 taxonomic groups of vertebrates and 153 unique taxa from 26 taxonomic groups of invertebrates represented by 49 species were detected in MOCNESS samples (Table 2). Stomiiformes, Myctophiformes, and Osmeriformes were the dominant vertebrate orders, representing 21%, 18%, and 17% of MOCNESS presences, respectively. Malacostraca, Siphonophorae, and Trachymedusae were the dominant invertebrate groups, representing 11%, 10%, and 9% of sample presences, respectively.

The ability to assign taxonomy to ASVs and compare taxonomy to MOCNESS data was limited by genetic reference libraries for both primer datasets. When matched to the



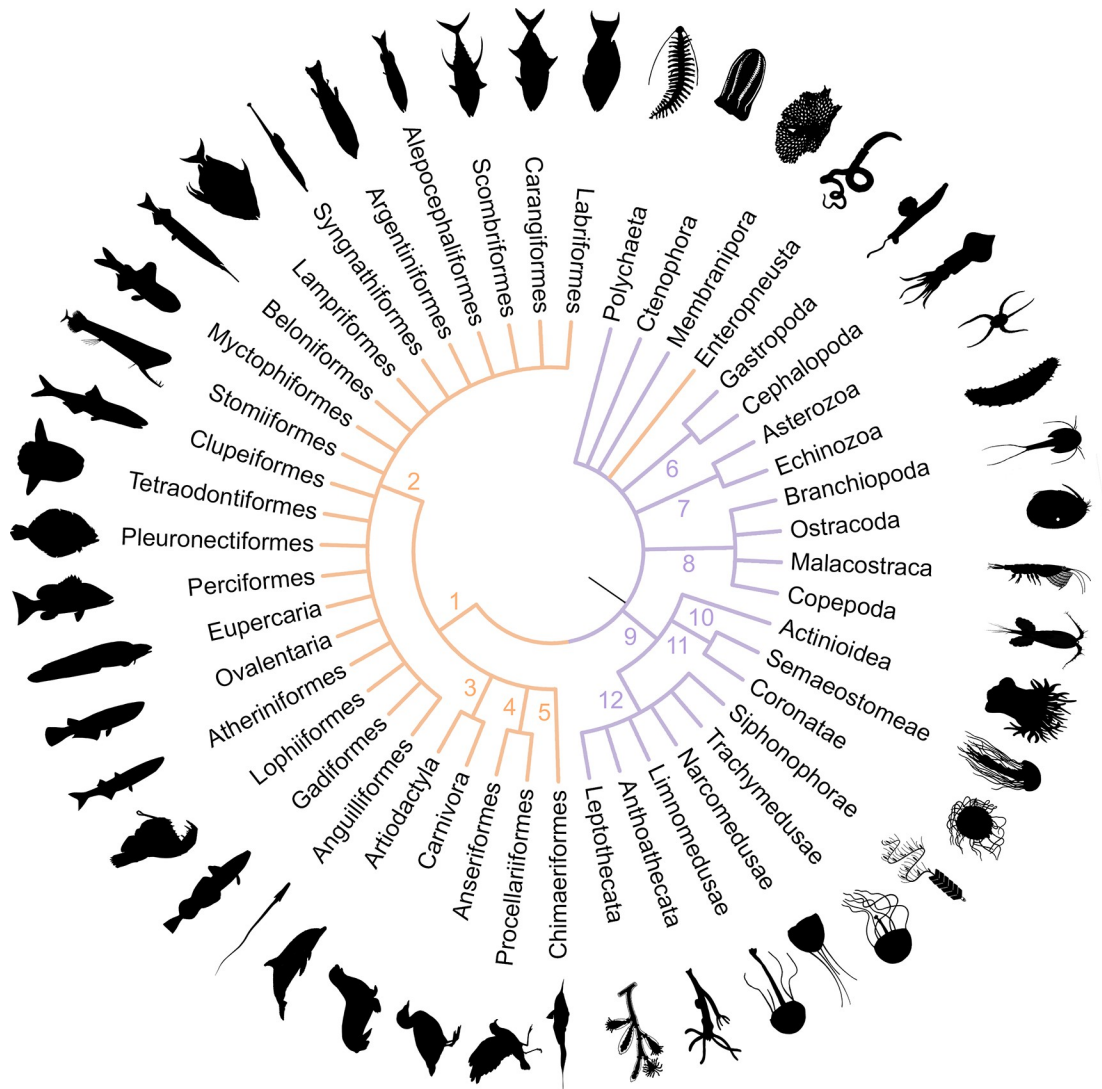

**Fig 2. Simplified phylogenetic tree of taxonomic groups detected by eDNA methods.** Groups identified using 12S are indicated in orange (Vertebrates: Phylum Chordata (1); Classes Actinopterygii (2), Mammalia (3), Aves (4), and Chondrichthyes (5); Hemichordates: Phylum Enteropneusta) and groups identified using COI are indicated in purple (Invertebrates: Phyla Ctenophora, Mollusca (6), Echinodermata (7), Cnidaria (9); Subphylum Crustacea (8); Classes Anthozoa (10), Scyphozoa (11), Hydrozoa (12), Polychaeta; Genus Membranipora). Branch lengths are not to scale.

<https://doi.org/10.1371/journal.pone.0303263.g002>

MIDORI2 (12S, GenBank 252 updated October 2022) and MetaZooGene (COI, GenBank 254 updated February 2023) reference databases, 55% and 86% of ASVs had a hit to the species level for 12S and COI, respectively. Of the unique taxa identified from MOCNESS, 25% of vertebrate and 16% of invertebrate taxa were absent from MIDORI2 and MetaZooGene databases, respectively.

### eDNA and MOCNESS methods sample distinct assemblages

Animal communities defined by proportional occurrence of taxonomic groups detected by eDNA and net-based sampling via MOCNESS were not significantly correlated across zones and depth groups (Mantel,  $r = 0.026$ ,  $p = 0.393$ ). Variability in proportional occurrence for all

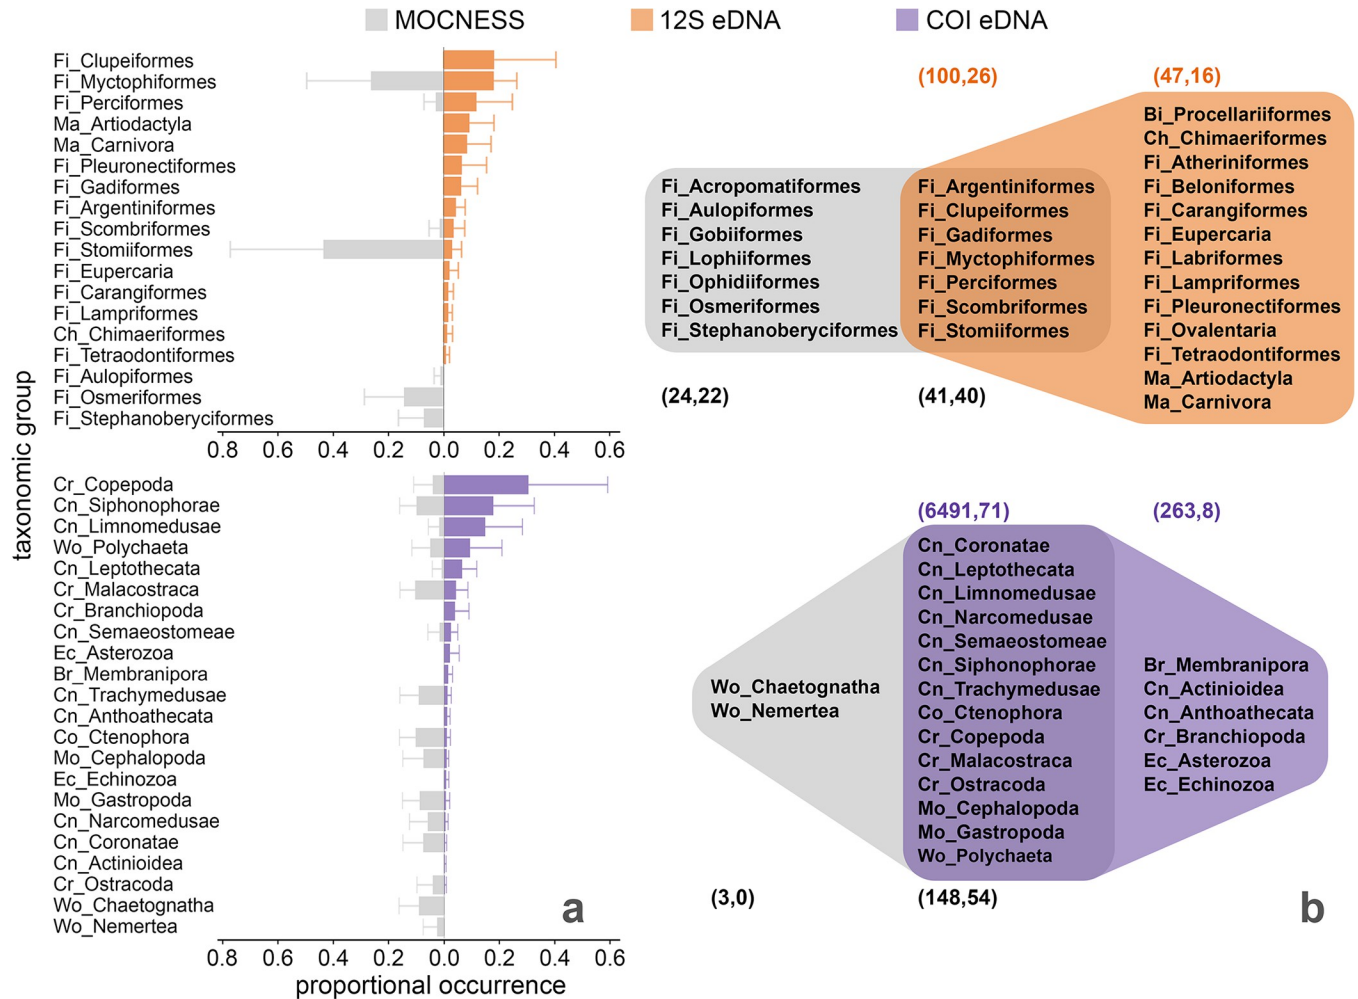

**Fig 3. eDNA sampled a higher diversity of taxonomic groups than MOCNESS.** (a) Mean proportional occurrence (± SD) of taxonomic groups in co-located MOCNESS (n = 27 nets) and eDNA samples from 0–1,750 m for vertebrate (n = 211 12S samples) and invertebrate groups (n = 244 COI samples). Bar charts include taxonomic orders with mean proportional occurrences greater than 0.01. (b) Venn diagrams show a higher richness of taxonomic groups sampled by eDNA than MOCNESS for both primers, but a higher number of vertebrate species were detected by MOCNESS. Number pairs describe total and species-level taxonomic richness for each method (number of ASVs for eDNA and unique taxonomic assignments for MOCNESS, number of species). Taxonomic group type key: Fi = bony fish, Ch = cartilaginous fish, Ma = mammal, Bi = bird; Cn = cnidarian, Cr = crustacean, Mo = mollusc, Br = bryozoan, Wo = worm, Ec = echinoderm.

<https://doi.org/10.1371/journal.pone.0303263.g003>

taxonomic groups within each method was similar across zones and depths (S2 Fig in S1 File) and were averaged across all samples according to each method (Fig 3A). The two methods shared representation of seven vertebrate (25% of 12S groups) and 14 invertebrate taxonomic groups (64% of COI groups, Fig 3B).

eDNA methods detected a greater richness of taxonomic groups than MOCNESS (Fig 3B), with 19 taxonomic groups exclusively detected in eDNA samples, versus nine groups exclusively observed in MOCNESS samples. Proportional occurrences of Clupeiformes, marine mammals (Artiodactyla, Carnivora), Copepoda, Limnomedusae, Leptothecata, and Branchiopoda were higher in the eDNA dataset. Conversely, Stomiiformes, Osmeriformes, Stephanobercyiformes, Malacostraca, Trachymedusae, Ctenophora, Gastropoda, and Chaetognatha had higher proportional occurrences in the MOCNESS dataset (Fig 3A).

### ASV diversity varies by primer and taxonomy

Each invertebrate species was represented by an average of  $78.1 \pm 184.6$  ASVs, with large variability both within and among taxonomic groups. Within the COI dataset, a single species of Limnomedusae (*Liriope tetraphylla*) was represented by 819 ASVs and the 25 species of copepods identified were represented by an average of  $177 \pm 244.9$  ASVs (Fig 4). Species in four other animal groups (Semaetostomeae, Siphonophorae, Ostracoda, and Branchiopoda) were each represented by more than 50 ASVs on average. Each vertebrate species was represented by an average of  $2.1 \pm 1.7$  ASVs. Species of Clupeiformes and Myctophiformes were each represented by more than five ASVs on average (Fig 4).

### eDNA concentrations and library completeness vary with depth

eDNA concentrations decreased with depth (Welch’s ANOVA,  $F = 590.65, p < 2.2 \times 10^{-16}$ , Table 3) and were an order of magnitude higher on average in samples collected shallower than 200 m ( $3.60 \text{ ng } \mu\text{l}^{-1}$ ) than in samples collected deeper than 600 m ( $0.32 \text{ ng } \mu\text{l}^{-1}$ , Fig 5A and S3 Fig in S1 File). The numbers of reads and ASVs per mL were consistently higher in COI than 12S samples but there was no clear variability in the numbers of reads or ASVs per mL across sampling depth bins for either 12S or COI samples (Kruskal-Wallis,  $X^2 = 0.83\text{--}5.89, p = 0.05\text{--}0.66$ , Table 3, Fig 5). After read- and sampling-time thresholding, only two 12S samples were collected deeper than 600 m and sampling depth was not a clear predictor of the proportion of ASVs identified to species in the 12S samples (Fig 5C). Fewer than 50% of all COI ASVs per sample could be identified to species (Fig 5F). COI samples collected shallower than 200 m had a higher proportion of ASVs identified to species than samples collected deeper than 200 m (Games-Howell,  $t = 2.80\text{--}3.17, p = 0.02\text{--}0.04$ ).

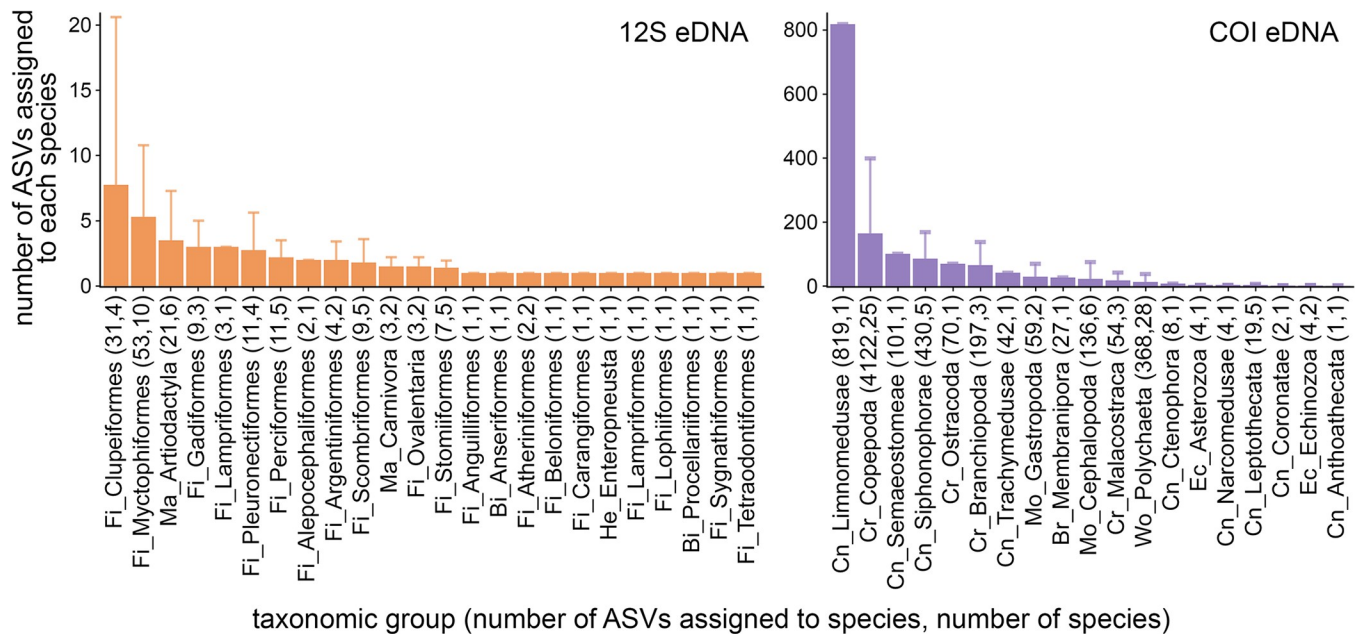

**Fig 4. Species were often represented by multiple ASVs, with large variations across taxonomic groups.** Bar plots display the mean number of ASVs per species within each taxonomic group, with error bars representing one standard deviation. Taxonomic group type key: Fi = bony fish, Ch = cartilaginous fish, Ma = mammal, Bi = bird, He = hemichordate, Cn = cnidarian, Cr = crustacean, Mo = mollusc, Br = bryozoan, Wo = worm, Ec = echinoderm.

<https://doi.org/10.1371/journal.pone.0303263.g004>

**Table 3. Summary of the effect of sampling depth on eDNA metrics.**

|                                            | Test            | statistic    | p-value                 |
|--------------------------------------------|-----------------|--------------|-------------------------|
| <b>All samples (n = 433)</b>               |                 |              |                         |
| DNA concentration (ng $\mu\text{l}^{-1}$ ) | Welch's ANOVA   | $F = 590.58$ | $< 2.2 \times 10^{-16}$ |
|                                            | GH <200:200–600 | $t = 17.09$  | $7.67 \times 10^{-13}$  |
|                                            | GH <200:>600    | $t = 34.46$  | $2.11 \times 10^{-10}$  |
|                                            | GH 200–600:>600 | $t = 10.91$  | $7.18 \times 10^{-14}$  |
| <b>12S (n = 231)</b>                       |                 |              |                         |
| Sequence reads per mL                      | Kruskal-Wallis  | $X^2 = 4.39$ | 0.11                    |
| ASVs per mL                                | Kruskal-Wallis  | $X^2 = 5.89$ | 0.05                    |
| Proportion ASVs to species                 | Kruskal-Wallis  | $X^2 = 2.44$ | 0.29                    |
| <b>COI (n = 331)</b>                       |                 |              |                         |
| Sequence reads per mL                      | Kruskal-Wallis  | $X^2 = 2.72$ | 0.26                    |
| ASVs per mL                                | Kruskal-Wallis  | $X^2 = 0.83$ | 0.66                    |
| Proportion ASVs to species                 | Welch's ANOVA   | $F = 16.36$  | $4.58 \times 10^{-3}$   |
|                                            | GH <200:200–600 | $t = 2.80$   | <b>0.02</b>             |
|                                            | GH <200:>600    | $t = 3.17$   | <b>0.04</b>             |
|                                            | GH 200–600:>600 | $t = 2.14$   | 0.15                    |

For most comparisons, a Kruskal-Wallis test was performed and Chi-squared values ( $X^2$ ) are reported. When data were non-normal and heteroscedastic among comparison groups, a Welch's ANOVA and Games-Howell *post hoc* tests (GH) were performed. p-values  $< 0.05$  are shown in bold text.

<https://doi.org/10.1371/journal.pone.0303263.t003>

## Resolving large-scale spatial variability in animal assemblages detected with eDNA

Hierarchical clustering demonstrated that low volume eDNA samples have variable ability to resolve geographically distinct animal assemblages across primers and taxa. Of the samples

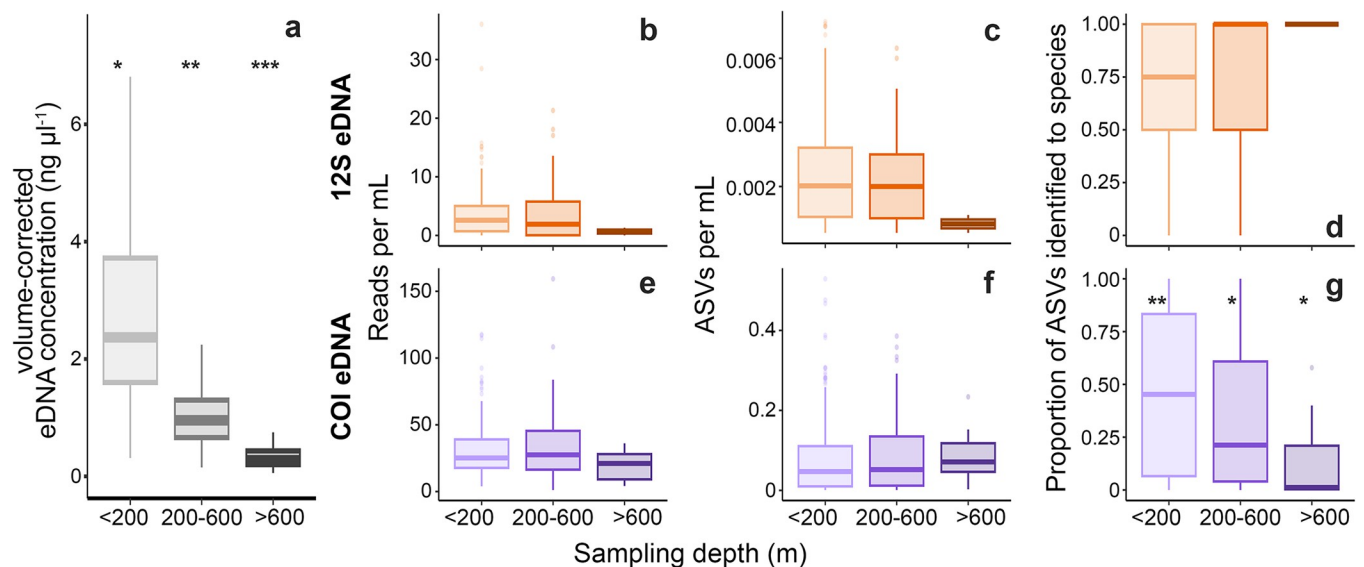

**Fig 5. eDNA sample characteristics with respect to primer and sampling depth.** (a) The concentration of DNA per sample decreased with depth (n = 433). For samples with more than 1,000 reads, the number of reads per mL (b,e) and total ASVs per mL of seawater (c,f) were not meaningfully variable across depth bins. The proportion of ASVs assigned to species (d,g) decreased with depth for COI samples (n = 331), with 12S samples (n = 231) having higher proportions of species-level identifications than COI across depths. Statistical differences among depth bins (Games-Howell,  $p < 0.05$ ) are indicated by the number of asterisks. Results of global and *post hoc* tests describing the effects of depth bin on each eDNA metric are given in Table 3.

<https://doi.org/10.1371/journal.pone.0303263.g005>

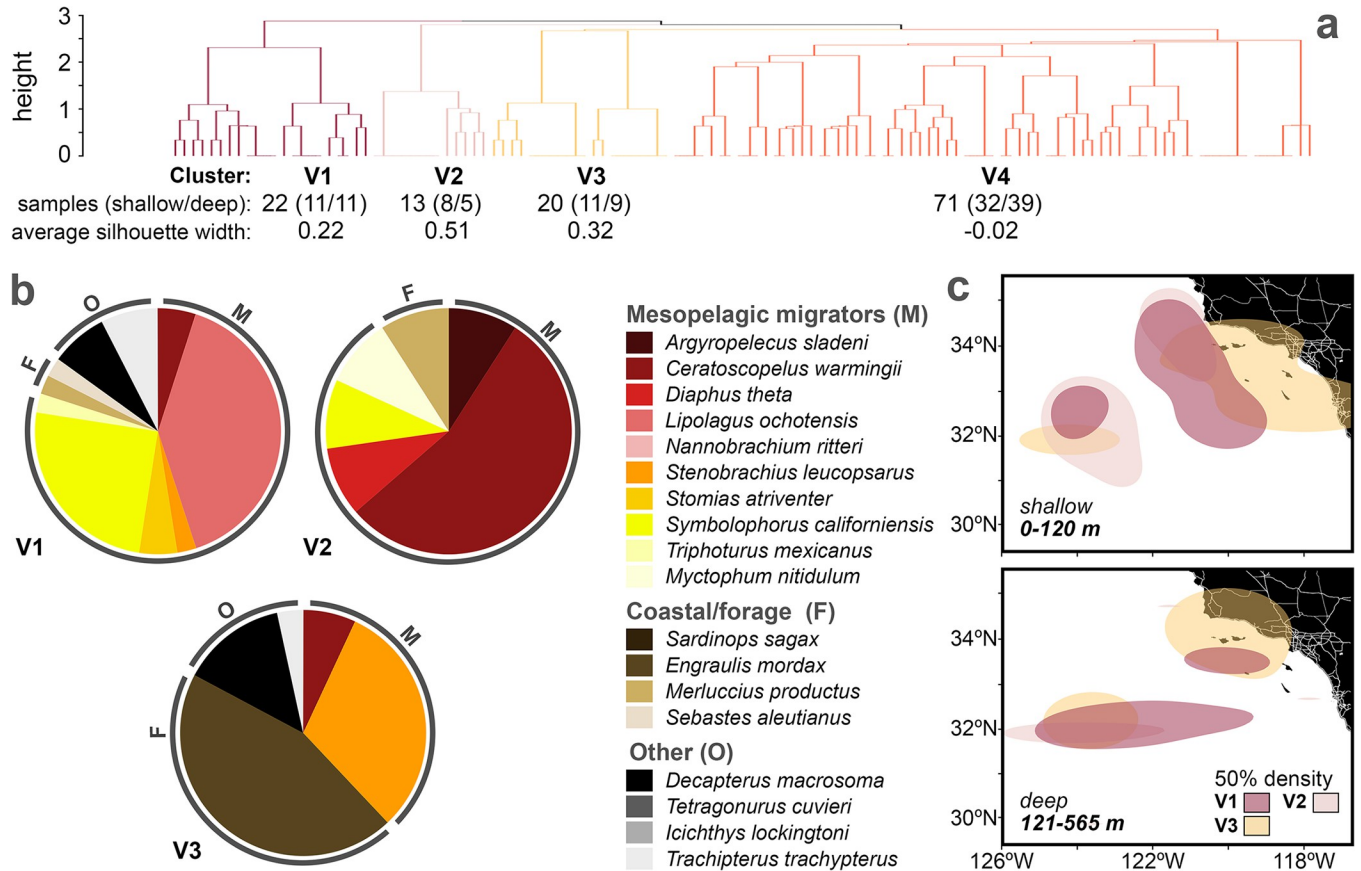

**Fig 6. Hierarchical clustering of 12S samples reflects three spatially variable fish assemblages dominated by either coastal pelagic or mesopelagic migrator species.** (a) Clustering was performed on 126 12S samples collected at night and only included species present in at least three samples. (b) Up to 10 of the most frequently occurring species are displayed for each cohesive cluster (average silhouette width >0.1). (c) Fifty percent probability density contours (“50% density”) demonstrate that nearshore clusters had the highest occurrences coastal forage species, and intermediate to offshore clusters were generally dominated by mesopelagic migrator species for both deep and shallow samples. Silhouette plots and additional probability density contour maps are given for each cluster in S5 and S6 Figs in S1 File, respectively.

<https://doi.org/10.1371/journal.pone.0303263.g006>

included in our analyses, night-collected samples comprised 62% and 59% of the 12S and COI datasets, while day-collected samples comprised 17% and 14%, respectively. The remainder were collected during transitional periods between day and night. Using the elbow method, we identified four clusters in both eDNA datasets (S4 Fig in S1 File). In the 12S dataset, nighttime samples formed three cohesive clusters (V1-V3, mean silhouette widths 0.22–0.51) with  $8.00 \pm 4.36$  species each (Fig 6A). Cluster V4 was not cohesive, with 65% of samples having negative silhouette widths (S5 Fig in S1 File). Each cohesive cluster was comprised of distinct assemblages of fishes with different biology and habitat preferences. The distributions of cohesive cluster samples largely aligned with known nearshore distributions of coastal forage species and offshore habitats of mesopelagic migrator taxa. Cluster V1 was dominated by the mesopelagic migrator species *Lipolagus ochotensis* (Bathylagidae) and *Symbolophorus californiensis* (Myctophidae) and contained shallow and deep samples. V2 was distributed mostly offshore in the southern part of our study area (S6 Fig in S1 File) and was dominated by an offshore myctophid species, *Ceratoscopelus warmingii* [61,62]. Cluster V3 was mostly contained shallow nearshore samples (Fig 6C and S6 Fig in S1 File) and was represented by the highest proportion of coastal forage species, dominated by the California anchovy, *Engraulis*

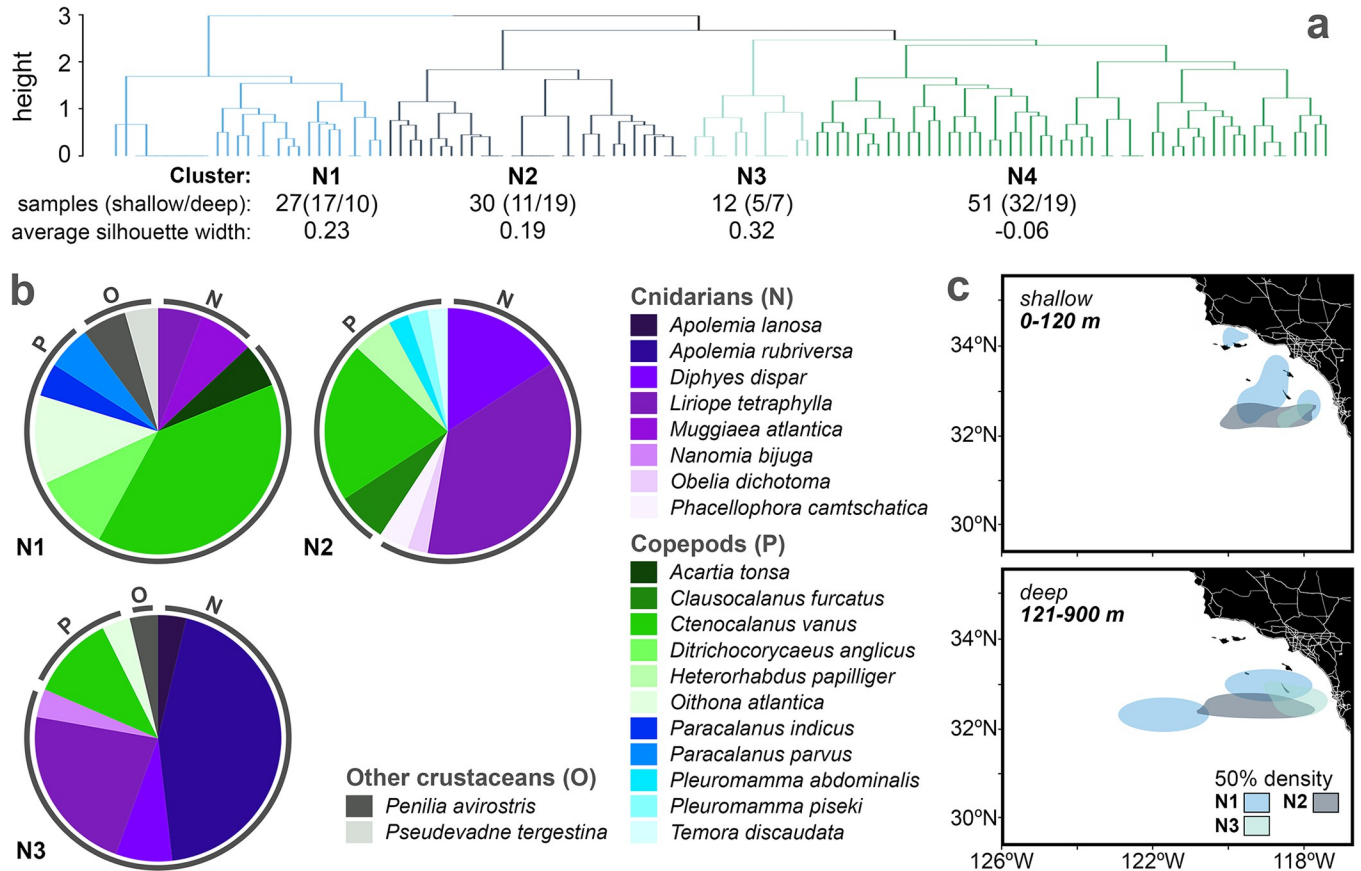

**Fig 7. Hierarchical clustering of COI samples reflects three spatially variable invertebrate assemblages dominated by copepod and cnidarian species.** (a) Clustering was performed on 120 COI samples collected at night and only included species present in at least three samples. (b) Up to 10 of the most frequently occurring species are displayed for each cohesive cluster (average silhouette width >0.1). (c) Fifty percent probability density contours (“50% density”) depict horizontal and vertical variability in the distribution of invertebrate assemblages. Silhouette plots and additional probability density contour maps are given for each cluster in S5 and S6 Figs in S1 File, respectively.

<https://doi.org/10.1371/journal.pone.0303263.g007>

*mordax*, and a myctophid with a relatively near-shore distribution in cooler habitats, *Stenobrachius leucopsaurus* ([63,64]; Fig 6B).

Hierarchical clustering also produced three cohesive clusters in the COI dataset (N1-N3, mean silhouette width 0.19–0.32) with  $14.33 \pm 9.07$  species each (Fig 7A). Cluster N4 was not cohesive, with 71% of samples having negative silhouette widths (S5 Fig in S1 File). All cohesive clusters were primarily represented by copepods and cnidarians known to be abundant in the CCE [65]. Clusters N1 and N2 were the most diverse (Fig 7B and S7 Fig in S1 File). N1 was mostly comprised of an assemblage of copepods with peak occurrences in the upper 100 m of the water column in coastal and offshore waters off southern California (e.g., *Ctenocalanus vanus*, *Ditrichocorycaeus anglicus* [66,67]). N2 contained roughly equal frequencies of cnidarians and copepods, dominated by species distributed throughout the water column in the southern region of our study area (e.g., *Liriope tetraphylla* and *Ctenocalanus vanus* [68]). Cluster N3 was dominated by deep-sea physonect siphonophores, including *Apolemia rubriversa* and *Apolemia lanosa* [69,70].

Few species were represented per sample across clusters for both 12S ( $1.68 \pm 0.28$ ) and COI samples ( $2.70 \pm 0.40$ , S7 Fig in S1 File), and the number of species represented in each COI sample was substantially lower than the number of ASVs ( $35.30 \pm 8.35$ , S2 Table in S1 File).

Clusters V3 and N3 had the lowest overall species richness and highest mean frequency of species occurrence across samples (S7 Fig in [S1 File](#)). Clusters V4 and N4 had the highest richness relative to the other clusters (S7 Fig in [S1 File](#)) but had low cohesiveness among samples (S5 Fig in [S1 File](#)). Although each sample detected few species, combining many low diversity samples enabled the identification of geographically distinct assemblages.

## Discussion

We found that low volume eDNA samples can be broadly useful for assessing the diversity and distribution of pelagic animals. By combining sequence data from numerous low volume samples collected from a broad spatial area and spanning extensive depth horizons, we observed animal assemblages comprised of zooplankton, micronekton, and coastal forage fishes. These assemblages were consistently distinct from those detected with nets but reflected known biogeographic patterns for dominant taxa. In general, eDNA samples represented a lower diversity of vertebrate species and a higher diversity of invertebrate species than animals collected by the large MOCNESS, which could be explained by method-specific biases. We discuss how eDNA methods represent assemblages across habitat depths and propose future work that could improve the ability of low volume eDNA samples to describe pelagic zooplankton and micronekton diversity.

## Method-specific biases explain variability in assemblages sampled by eDNA and MOCNESS

Differences in the detection of animals via eDNA and MOCNESS methods were consistent among sampling zones and depths and were most notably driven by variability in the degree of size selectivity between methods. Since eDNA is detected at the molecular-, rather than the individual scale, it does not bias against size in the same way that net-based sampling does [71]. We detected mammals as well as small copepods and likely larvae or gametes via eDNA sampling; specimens which are generally too large or small, respectively, to be retained by 10 m<sup>2</sup> MOCNESS sampling. Within the size ranges of zooplankton and micronekton, we also detected organisms using eDNA that are fragile and generally poorly sampled by nets (e.g., Cnidarians [4]) or mobile enough to avoid sampling (e.g., coastal forage fishes including Clupeiformes [72]). Although eDNA methods can sample taxa across a large size range, larger individuals are likely to shed more eDNA than smaller individuals of the same species, complicating the relationship between eDNA concentration and organism abundance [73].

Across taxonomic groups, species that were readily detected with eDNA methods are known to be abundant in the southern CCE (e.g., fishes: *Engraulis mordax*, *Nannobranchium ritteri*; dolphin: *Delphinus delphis*; copepod: *Ctenocalanus vanus*; medusa: *Liriope tetraphylla*). However, some abundant groups from the MOCNESS samples were notably rare in our eDNA datasets. Malacostracan crustaceans, particularly euphausiids and decapods, comprise a large proportion of pelagic biomass [2,4,74] can shed less DNA compared to fishes and gelatinous taxa [22] and represented a very small proportion of the COI ASVs and reads. Although we detected a very large number of cnidarian ASVs, most cnidarians groups were underrepresented in the COI eDNA dataset relative to their abundance in the MOCNESS dataset. This could stem from irregular shedding mechanisms among gelatinous organisms [22] or poor representation by the COI marker gene [75–78]. Ctenophores and molluscs have high rates of evolution in the mitochondrial COI gene, making it a less effective ‘universal’ barcode region for those groups [76,77,79]. For all taxa, positive identification of ASVs are directly dependent upon representation in verified reference libraries, which is known to be highly limited for

ctenophores [80]. Moreover, incorrect taxonomy can be assigned to an ASV if it shares a barcode sequence with a closely related but distinct species.

All groups that were better represented by MOCNESS contained species that were not present in the genetic reference libraries. There is a clear need for improved verified reference libraries for abundant pelagic invertebrate groups (e.g., malacostracan crustaceans, cnidarians) to improve our ability to reliably assign species-level identifications to both specimens and sequences [81,82]. Recent efforts have greatly improved regional reference libraries for epipelagic and coastal fishes in the CCE [83], but there has been little focus on invertebrate groups relative to their high taxonomic diversity and abundance across the water column [2,4,74].

### Sampling depth affects species detection with eDNA

eDNA concentrations were an order of magnitude higher in shallow than in deep samples, consistent with observations from other pelagic systems [28,32]. Despite decreasing eDNA concentrations, we observed limited variability in the number of reads and ASVs per mL across the water column, suggesting that sampling depth did not affect our ability to detect diversity in the selected marker genes. There was no apparent variability in the proportion of 12S ASVs assigned to species across sampling depths. However, deeper-dwelling invertebrate taxa appear to be particularly underrepresented in COI reference libraries; the proportion of species-level ASV taxonomic assignments was three times higher in COI samples collected shallower than 200 m than in those collected deeper than 600 m.

Variability in the proportion of COI ASVs assigned to species across depths could also be driven by changes in community composition with depth. Although we were not able to assess variability in 12S library performance across our deepest samples, the rate at which fishes shed genetic material increases with metabolic rate [84,85], which generally decreases with depth of occurrence [86–88]. Some abundant deep pelagic fish groups, including members of the Stomiiformes, are scaleless, which may further reduce shedding rates and help explain their absence from the 12S dataset. Malacostracan crustaceans and cnidarians comprise increasing proportions of pelagic micronekton biomass with depth (e.g., [4,74]). Thus, poor representation of these groups in reference libraries greatly limits the realistic representation of deep pelagic animal assemblages. Continued efforts to generate barcode sequences for deep-pelagic invertebrates across multiple marker regions would drastically improve the utility of eDNA for broad detection of animal assemblages across habitat depths.

### Relating eDNA sequence diversity to assemblage diversity

By applying “universal” PCR primers for both vertebrates and invertebrates, we were able to detect diverse taxa across a large size range that typically requires extensive expertise and effort to morphologically identify with net-based sampling. Although these advantages make eDNA methods broadly useful for sampling animals, the lack of size selectivity and variability in suitability of genetic markers make it difficult to discern ecologically meaningful assemblages [89]. Among taxa that are well represented by the selected markers, there is clear variability in the relationship between ASV diversity and species diversity. We observed over two orders of magnitude variability in the number of COI ASVs per species across invertebrate groups, with 37 species represented by more than 50 ASVs (Fig 4). COI samples included in the clustering analyses contained thousands of reads and dozens of ASVs, but only represented ~2 species each (S2 Table and S7 Fig in S1 File). There were fewer ASVs per species among vertebrate groups detected in the 12S dataset. Community analyses that utilize ASVs instead of taxonomic IDs will overrepresent taxonomic diversity and could erroneously inflate variability among sampling sites and depths [90,91]. Clustering ASVs into operational taxonomic units



(OTUs) based on percent identity thresholds is a common approach for mitigating variable resolution taxonomic assignments including multiple ASVs per species [28,92,93]. Blanco-Bercial et al. [93] showed high agreement between COI OTU diversity and species diversity in copepods, but the relationship is poorly studied across animal groups and marker regions and OTUs are not necessarily replicable across studies [37]. Conversely, species represented by extremely high numbers of ASVs (e.g., the medusa *Liriope tetraphylla*) may represent misidentifications that could underrepresent taxonomic diversity. Continued improvements of reference libraries (as in [83]) will enable better taxonomic assignments for poorly sampled groups and broader comparisons across studies using species-level eDNA analyses.

### Low volume eDNA samples can resolve some biogeographic structure in the pelagic

Our findings suggest that while low volume eDNA samples may not be appropriate for exhaustive diversity assessments, they can resolve large-scale spatial variability in the presences of abundant taxa. More than 50 vertebrate and invertebrate species were represented in our taxonomically restrictive clustering analyses and each cohesive cluster ( $n = 6$ ) contained an average of eight species for 12S and 14 species for COI. Large numbers of small volume samples increased the species richness in our dataset, analogous to the increases seen with larger sample volumes and replicates in other studies [28,94,95]. Some geographical and taxonomic overlap was observed between most clusters, which could be explained by the minimal number of species within each sample (S7A and S7D Fig in [S1 File](#)) and variable spatial ranges of the taxa represented. Although cross-contamination among samples could also obscure spatial structure in our samples, clusters generally reflected the known distributions of abundant taxa detected with both primers. Samples collected near the coast in shallow waters were dominated by fishes, copepods, and cnidarians with known coastal distributions, while offshore and deep samples were generally comprised of vertically-migrating fishes and midwater cnidarians known to occur in offshore habitats. Low volume eDNA samples may currently be best suited for monitoring abundant species across taxonomic groups that are well represented by universal primers. If the relationships between these taxa, environmental conditions, and broader animal communities are known or can be quantified (e.g., [96,97]), taxa detected by low volume eDNA analyses could be treated as indicators of broader animal community variability [98,99].

### Towards animal assemblage monitoring with low volume eDNA samples

It is likely that monitoring of pelagic animals with eDNA will often rely on low volume water samples, either from existing sampling programs, cruises of opportunity, and even using dedicated sampling with autonomous underwater vehicles [100–102]. Thus, optimizing low volume eDNA methods is critical for supporting pelagic monitoring efforts. Given low agreement in species diversity between eDNA replicates [28,91,94], the retention of material for future replication is not necessary and use of entire eDNA filters would increase the quantity of genetic material and number of species detected per sample. Further, setting a higher target sequencing depth could also be a prudent way to increase the number of reads generated and species detected in low volume samples [103]. Application of an additional genetic marker to target malacostracan crustaceans, such as an 18S primer, has demonstrated improved capability of capturing this important component of the pelagic ecosystem [104], partially due to the larger number of reference sequences available for 18S compared to COI [105]. Implementation of a larger number of markers to better represent the diversity of pelagic animals (especially malacostracan crustaceans, cnidarians, and molluscs) would drastically improve

taxonomic coverage and maximize the value of limited seawater samples. While large volume sampling and greater sequencing depths is clearly necessary for more comprehensive biodiversity inventories, continued improvement of reference libraries could combat issues of limited material in low volume samples. In the meantime, focusing on abundant “indicator” species may reveal broad responses to environmental variability [106,107] and allow for monitoring of pelagic animal assemblages with low volume eDNA sampling.

## Supporting information

**S1 File. All supplementary figures, tables, and methods.** The supplementary material contains seven figures (S1-S7 Figs), two tables (S1 and S2 Tables), and methods information including descriptions of the primers used, PCR recipes, and PCR cycle conditions. (PDF)

**S1 Dataset. All data required to replicate each of the analyses and figures presented in this study.** This Excel data file consists of nine separate worksheets including a READ\_ME that describes the data presented and the figures and tables that were generated from each corresponding sheet. (XLSX)

## Acknowledgments

We acknowledge the members of the Choy and Bowman labs at Scripps Institution of Oceanography for their support with sample collection, training on molecular techniques, and feedback. We thank the crew members aboard R/V *Roger Revelle* and R/V *Sally Ride* on cruises RR2104 and SR2111. Alyson Santoro and Justine Albers were especially helpful in orchestrating eDNA sample collection on RR2104. We thank Grace Fulton for collecting water samples on CalCOFI cruise SR2111.

## Author Contributions

**Conceptualization:** Jeff S. Bowman, Brice X. Semmens, C. Anela Choy.

**Data curation:** Michelle E. Dan, Elan J. Portner, Jeff S. Bowman, Sarah M. Owens, Stephanie M. Greenwald.

**Formal analysis:** Michelle E. Dan, Elan J. Portner, Jeff S. Bowman, C. Anela Choy.

**Funding acquisition:** Jeff S. Bowman, Brice X. Semmens, C. Anela Choy.

**Investigation:** Michelle E. Dan, Elan J. Portner, C. Anela Choy.

**Methodology:** Sarah M. Owens, Stephanie M. Greenwald, C. Anela Choy.

**Project administration:** Jeff S. Bowman, Brice X. Semmens, Sarah M. Owens, Stephanie M. Greenwald, C. Anela Choy.

**Resources:** Jeff S. Bowman, Sarah M. Owens, C. Anela Choy.

**Supervision:** Jeff S. Bowman, C. Anela Choy.

**Validation:** Michelle E. Dan, Elan J. Portner, Jeff S. Bowman, Sarah M. Owens, C. Anela Choy.

**Visualization:** Michelle E. Dan, Elan J. Portner, C. Anela Choy.

**Writing – original draft:** Michelle E. Dan, Elan J. Portner, C. Anela Choy.

**Writing – review & editing:** Michelle E. Dan, Elan J. Portner, Jeff S. Bowman, Brice X. Semmens, Sarah M. Owens, Stephanie M. Greenwald, C. Anela Choy.

## References

1. Woodworth-Jefcoats PA, Polovina JJ, Drazen JC. Climate change is projected to reduce carrying capacity and redistribute species richness in North Pacific pelagic marine ecosystems. *Glob Chang Biol*. 2017; 23: 1000–1008. <https://doi.org/10.1111/gcb.13471> PMID: 27545818
2. Choy CA, Wabnitz C, Weijerman M, Woodworth-Jefcoats PA, Polovina JJ. Finding the way to the top: how the composition of oceanic mid-trophic micronekton groups determines apex predator biomass in the central North Pacific. *Mar Ecol Prog Ser*. 2016; 549: 9–25. <https://doi.org/10.3354/meps11680>
3. Steinberg DK, Landry MR. Zooplankton and the ocean carbon cycle. *Ann Rev Mar Sci*. 2017; 9: 413–444. <https://doi.org/10.1146/annurev-marine-010814-015924> PMID: 27814033
4. Hetherington ED, Choy CA, Thuesen EV, Haddock SHD. Three distinct views of deep pelagic community composition based on complementary sampling approaches. *Front Mar Sci*. 2022; 9. <https://doi.org/10.3389/fmars.2022.864004>
5. Sutton TT, Wiebe PH, Madin L, Bucklin A. Diversity and community structure of pelagic fishes to 5000m depth in the Sargasso Sea. *Deep-Sea Res Part 2 Top Stud Oceanogr*. 2010; 57: 2220–2233. <https://doi.org/10.1016/j.dsr2.2010.09.024>
6. Deiner K, Bik HM, Mächler E, Seymour M, Lacoursière-Roussel A, Altermatt F, et al. Environmental DNA metabarcoding: Transforming how we survey animal and plant communities. *Mol Ecol*. 2017; 26: 5872–5895. <https://doi.org/10.1111/mec.14350> PMID: 28921802
7. Closek CJ, Santora JA, Starks HA, Schroeder ID, Andruszkiewicz EA, Sakuma KM, et al. Marine vertebrate biodiversity and distribution within the central California Current using environmental DNA (eDNA) metabarcoding and ecosystem surveys. *Front Mar Sci*. 2019; 6. <https://doi.org/10.3389/fmars.2019.00732>
8. Taberlet P, Coissac E, Pompanon F, Brochmann C, Willerslev E. Towards next-generation biodiversity assessment using DNA metabarcoding. *Mol Ecol*. 2012; 21: 2045–2050. <https://doi.org/10.1111/j.1365-294X.2012.05470.x> PMID: 22486824
9. Miya M. Environmental DNA Metabarcoding: A novel method for biodiversity monitoring of marine fish communities. *Ann Rev Mar Sci*. 2022; 14: 161–185. <https://doi.org/10.1146/annurev-marine-041421-082251> PMID: 34351788
10. Kaartvedt S, Staby A, Aksnes DL. Efficient trawl avoidance by mesopelagic fishes causes large underestimation of their biomass. *Mar Ecol Prog Ser*. 2012; 456: 1–6. <https://doi.org/10.3354/meps09785>
11. Kwong LE, Pakhomov EA, Suntsov AV, Seki MP, Brodeur RD, Pakhomova LG, et al. An intercomparison of the taxonomic and size composition of tropical macrozooplankton and micronekton collected using three sampling gears. *Deep-Sea Res Part 1 Oceanogr Res Pap*. 2018; 135: 34–45. <https://doi.org/10.1016/j.dsr.2018.03.013>
12. Bucklin A, Peijnenburg KTCA, Kosobokova KN, O'Brien TD, Blanco-Bercial L, Cornils A, et al. Toward a global reference database of COI barcodes for marine zooplankton. *Mar Biol*. 2021; 168: 78. <https://doi.org/10.1007/s00227-021-03887-y>
13. Ershova EA, Wangenstein OS, Descoteaux R, Barth-Jensen C, Præbel K. Metabarcoding as a quantitative tool for estimating biodiversity and relative biomass of marine zooplankton. *ICES J Mar Sci*. 2021; 78: 3342–3355. <https://doi.org/10.1093/icesjms/fsab171>
14. Zhang Y, Pavlovska M, Stoica E, Prekrasna I, Yang J, Slobodnik J, et al. Holistic pelagic biodiversity monitoring of the Black Sea via eDNA metabarcoding approach: From bacteria to marine mammals. *Environ Int*. 2020; 135: 105307. <https://doi.org/10.1016/j.envint.2019.105307> PMID: 31881429
15. Sommer SA, Van Woudenberg L, Lenz PH, Cepeda G, Goetze E. Vertical gradients in species richness and community composition across the twilight zone in the North Pacific Subtropical Gyre. *Mol Ecol*. 2017; 26: 6136–6156. <https://doi.org/10.1111/mec.14286> PMID: 28792641
16. Robinson KM, Prentice C, Clemente-Carvalho R, Hall K, Monteith ZL, Morien E, et al. Paired environmental DNA and dive surveys provide distinct but complementary snapshots of marine biodiversity in a temperate fjord. *Environ DNA*. 2023; 5: 597–612. <https://doi.org/10.1002/edn3.423>
17. Govindarajan AF, Francolini RD, Jech JM, Lavery AC, Llopiz JK, Wiebe PH, et al. Exploring the use of environmental DNA (eDNA) to detect animal taxa in the mesopelagic zone. *Front Ecol Evol*. 2021; 9. <https://doi.org/10.3389/fevo.2021.574877>
18. Cote D, McClenaghan B, Desforges J, Fahner NA, Hajibabaei M, Chawarski J, et al. Comparing eDNA metabarcoding and conventional pelagic netting to inform biodiversity monitoring in deep ocean environments. *ICES J Mar Sci*. 2023. <https://doi.org/10.1093/icesjms/fsad169>

19. Feng Y, Sun D, Shao Q, Fang C, Wang C. Mesozooplankton biodiversity, vertical assemblages, and diel migration in the western tropical Pacific Ocean revealed by eDNA metabarcoding and morphological methods. *Front Mar Sci.* 2022; 9. <https://doi.org/10.3389/fmars.2022.1004410>
20. Fraija-Fernández N, Bouquieaux M-C, Rey A, Mendibil I, Cotano U, Irigoien X, et al. Marine water environmental DNA metabarcoding provides a comprehensive fish diversity assessment and reveals spatial patterns in a large oceanic area. *Ecol Evol.* 2020; 10: 7560–7584. <https://doi.org/10.1002/ece3.6482> PMID: 32760549
21. Suter L, Polanowski AM, Clarke LJ, Kitchener JA, Deagle BE. Capturing open ocean biodiversity: Comparing environmental DNA metabarcoding to the continuous plankton recorder. *Mol Ecol.* 2021; 30: 3140–3157. <https://doi.org/10.1111/mec.15587> PMID: 32767849
22. Andruszkiewicz Allan E, Zhang WG, Lavery A, Govindarajan A. Environmental DNA shedding and decay rates from diverse animal forms and thermal regimes. *Environ DNA.* 2021; 3: 492–514. <https://doi.org/10.1002/edn3.141>
23. Clarke LJ, Beard JM, Swadling KM, Deagle BE. Effect of marker choice and thermal cycling protocol on zooplankton DNA metabarcoding studies. *Ecol Evol.* 2017; 7: 873–883. <https://doi.org/10.1002/ece3.2667> PMID: 28168024
24. Dziejdzic E, Sidlauskas B, Cronn R, Anthony J, Cornwell T, Friesen TA, et al. Creating, curating and evaluating a mitogenomic reference database to improve regional species identification using environmental DNA. *Mol Ecol Resour.* 2023; 23: 1880–1904. <https://doi.org/10.1111/1755-0998.13855> PMID: 37602732
25. Schroeter JC, Maloy AP, Rees CB, Bartron ML. Fish mitochondrial genome sequencing: expanding genetic resources to support species detection and biodiversity monitoring using environmental DNA. *Conserv Genet Resour.* 2020; 12: 433–446. <https://doi.org/10.1007/s12686-019-01111-0>
26. West K, Travers MJ, Stat M, Harvey ES, Richards ZT, DiBattista JD, et al. Large-scale eDNA metabarcoding survey reveals marine biogeographic break and transitions over tropical north-western Australia. *Divers Distrib.* 2021; 27: 1942–1957. <https://doi.org/10.1111/ddi.13228>
27. Nguyen BN, Shen EW, Seemann J, Correa AMS, O'Donnell JL, Altieri AH, et al. Environmental DNA survey captures patterns of fish and invertebrate diversity across a tropical seascape. *Sci Rep.* 2020; 10: 6729. <https://doi.org/10.1038/s41598-020-63565-9> PMID: 32317664
28. Govindarajan AF, McCartin L, Adams A, Allan E, Belani A, Francolini R, et al. Improved biodiversity detection using a large-volume environmental DNA sampler with in situ filtration and implications for marine eDNA sampling strategies. *Deep-Sea Res Part 1 Oceanogr Res Pap.* 2022; 189: 103871. <https://doi.org/10.1016/j.dsr.2022.103871>
29. Easson CG, Boswell KM, Tucker N, Warren JD, Lopez JV. Combined eDNA and Acoustic Analysis Reflects Diel Vertical Migration of Mixed Consortia in the Gulf of Mexico. *Front Mar Sci.* 2020; 7. <https://doi.org/10.3389/fmars.2020.00552>
30. Visser F, Merten VJ, Bayer T, Oudejans MG, de Jonge DSW, Puebla O, et al. Deep-sea predator niche segregation revealed by combined cetacean biologging and eDNA analysis of cephalopod prey. *Sci Adv.* 2021; 7. <https://doi.org/10.1126/sciadv.abf5908> PMID: 33789903
31. Robison BH. Conservation of deep pelagic biodiversity. *Conserv Biol.* 2009; 23: 847–858. <https://doi.org/10.1111/j.1523-1739.2009.01219.x> PMID: 19627317
32. McClenaghan B, Fahner N, Cote D, Chawarski J, McCarthy A, Rajabi H, et al. Harnessing the power of eDNA metabarcoding for the detection of deep-sea fishes. *PLoS One.* 2020; 15: e0236540. <https://doi.org/10.1371/journal.pone.0236540> PMID: 33147221
33. Ramón-Laca A, Wells A, Park L. A workflow for the relative quantification of multiple fish species from oceanic water samples using environmental DNA (eDNA) to support large-scale fishery surveys. *PLoS One.* 2021; 16: e0257773. <https://doi.org/10.1371/journal.pone.0257773> PMID: 34570816
34. McClatchie S. *Regional Fisheries Oceanography of the California Current System and the CalCOFI program.* Netherlands: Springer; 2014. <https://doi.org/10.1007/978-94-007-7223-6>
35. NOAA National Centers for Environmental Information. ETOPO 2022 15 Arc-Second Global Relief Model. NOAA National Centers for Environmental Information; 2022. <https://doi.org/10.25921/fd45-gt74>
36. Choy CA, Popp BN, Hannides CCS, Drazen JC. Trophic structure and food resources of epipelagic and mesopelagic fishes in the North Pacific Subtropical Gyre ecosystem inferred from nitrogen isotopic compositions. *Limnol Oceanogr.* 2015; 60: 1156–1171. <https://doi.org/10.1002/lno.10085>
37. Collins AR, Bakker J, Wangenstein OS, Soto AZ, Corrigan L, Sims DW, et al. Non-specific amplification compromises environmental DNA metabarcoding with COI. *Methods Ecol Evol.* 2019; 10: 1985–2001. <https://doi.org/10.1111/2041-210X.13276>

38. Pitz KJ, Guo J, Johnson SB, Campbell TL, Zhang H, Vrijenhoek RC, et al. Zooplankton biogeographic boundaries in the California Current System as determined from metabarcoding. *PLoS One*. 2020; 15: e0235159. <https://doi.org/10.1371/journal.pone.0235159> PMID: 32584911
39. Nimz I, Renshaw MA, Baczenas J, Vanderlip C, Hyrenbach KD, Iacchi M. MetaBARFcoding: DNA-barcoding of regurgitated prey yields insights into Christmas shearwater (*Puffinus nativitatis*) foraging ecology at Hōlanikū (Kure Atoll), Hawai'i. *Environ DNA*. 2022; 4: 254–268. <https://doi.org/10.1002/edn3.263>
40. Riaz T, Shehzad W, Viari A, Pompanon F, Taberlet P, Coissac E. ecoPrimers: inference of new DNA barcode markers from whole genome sequence analysis. *Nucleic Acids Res*. 2011; 39: e145. <https://doi.org/10.1093/nar/gkr732> PMID: 21930509
41. Leray M, Yang JY, Meyer CP, Mills SC, Agudelo N, Ranwez V, et al. A new versatile primer set targeting a short fragment of the mitochondrial COI region for metabarcoding metazoan diversity: application for characterizing coral reef fish gut contents. *Front Zool*. 2013; 10: 1–14. <https://doi.org/10.1186/1742-9994-10-34> PMID: 23767809
42. Callahan BJ, McMurdie PJ, Rosen MJ, Han AW, Johnson AJA, Holmes SP. dada2: High-resolution sample inference from Illumina amplicon data. *Nat Methods*. 2016; 13: 581–583. <https://doi.org/10.1038/nmeth.3869> PMID: 27214047
43. Leray M, Knowlton N, Machida RJ. MIDORI2: A collection of quality controlled, preformatted, and regularly updated reference databases for taxonomic assignment of eukaryotic mitochondrial sequences. *Environ DNA*. 2022; 4: 894–907. <https://doi.org/10.1002/edn3.303>
44. Govindarajan AF, Llopiz JK, Caiger PE, Jech JM, Lavery AC, McMonagle H, et al. Assessing mesopelagic fish diversity and diel vertical migration with environmental DNA. *Front Mar Sci*. 2023; 10. <https://doi.org/10.3389/fmars.2023.1219993>
45. Betancur-R R, Wiley EO, Arratia G, Acero A, Bailly N, Miya M, et al. Phylogenetic classification of bony fishes. *BMC Evol Biol*. 2017; 17: 162. <https://doi.org/10.1186/s12862-017-0958-3> PMID: 28683774
46. Robin ED, Wong R. Mitochondrial DNA molecules and virtual number of mitochondria per cell in mammalian cells. *J Cell Physiol*. 1988; 136: 507–513. <https://doi.org/10.1002/jcp.1041360316> PMID: 3170646
47. Mathieu C, Hermans SM, Lear G, Buckley TR, Lee KC, Buckley HL. A systematic review of sources of variability and uncertainty in eDNA data for environmental monitoring. *Front Ecol Evol*. 2020; 8. <https://doi.org/10.3389/fevo.2020.00135>
48. Horn HS. Measurement of “Overlap” in Comparative Ecological Studies. *Am Nat*. 1966; 100: 419–424. Available from: <http://www.jstor.org/stable/2459242>
49. Oksanen J, Simpson GL, Blanchet GF, Kindt R, Legendre P, Minchin PR, et al. vegan: Community Ecology Package. R package version 2.6–4. 2022. Available from: <https://CRAN.R-project.org/package=vegan>
50. Netburn AN, Anthony Koslow J. Dissolved oxygen as a constraint on daytime deep scattering layer depth in the southern California current ecosystem. *Deep-Sea Res Part 1 Oceanogr Res Pap*. 2015; 104: 149–158. <https://doi.org/10.1016/j.dsr.2015.06.006>
51. Welch BL. On the comparison of several mean values: An alternative approach. *Biometrika*. 1951; 38: 330–336. <https://doi.org/10.2307/2332579>
52. Cribbie RA, Wilcox RR, Bewell C, Keselman HJ. Tests for treatment group equality when data are non-normal and heteroscedastic. *J Mod Appl Stat Methods*. 2007; 6: 12. <https://doi.org/10.22237/jmasm/1177992660>
53. Holm S. A simple sequentially rejective multiple test procedure. *Scand Stat Theory Appl*. 1979; 6: 65–70. Available from: <http://www.jstor.org/stable/4615733>
54. Berry TE, Saunders BJ, Coghlan ML, Stat M, Jarman S, Richardson AJ, et al. Marine environmental DNA biomonitoring reveals seasonal patterns in biodiversity and identifies ecosystem responses to anomalous climatic events. *PLoS Genet*. 2019; 15: e1007943. <https://doi.org/10.1371/journal.pgen.1007943> PMID: 30735490
55. Legendre P, Gallagher ED. Ecologically meaningful transformations for ordination of species data. *Oecologia*. 2001; 129: 271–280. <https://doi.org/10.1007/s004420100716> PMID: 28547606
56. Rourke ML, Fowler AM, Hughes JM, Broadhurst MK, DiBattista JD, Fielder S, et al. Environmental DNA (eDNA) as a tool for assessing fish biomass: A review of approaches and future considerations for resource surveys. *Environ DNA*. 2022; 4: 9–33. <https://doi.org/10.1002/edn3.185>
57. Murtagh F, Legendre P. Ward’s hierarchical agglomerative clustering method: Which algorithms implement Ward’s criterion? *J Classif*. 2014; 31: 274–295. <https://doi.org/10.1007/s00357-014-9161-z>

58. R Core Team. R: A Language and Environment for Statistical Computing. Vienna, Austria: R Foundation for Statistical Computing; 2022. Available from: <https://www.r-project.org>
59. Kassambara A. Factoextra: extract and visualize the results of multivariate data analyses. R Package Version. 2016; 1. Available from: <https://cir.nii.ac.jp/crid/1370004235968325765>
60. Rousseeuw PJ. Silhouettes: A graphical aid to the interpretation and validation of cluster analysis. J Comput Appl Math. 1987; 20: 53–65. [https://doi.org/10.1016/0377-0427\(87\)90125-7](https://doi.org/10.1016/0377-0427(87)90125-7)
61. Moser GH, Smith PE. Larval fish assemblages of the California Current region and their horizontal and vertical distributions across a front. Bull Mar Sci. 1993; 53: 645–691. Available from: <https://swfsc-publications.fisheries.noaa.gov/publications/CR/1993/9362.pdf>
62. Robison BH. Herbivory by the myctophid fish *Ceratoscopelus warmingii*. Mar Biol. 1984; 84: 119–123. <https://doi.org/10.1007/BF00392995>
63. Cailliet GM, Ebeling AW. The vertical distribution and feeding habits of two common midwater fishes (*Leuroglossus stilbius* and *Stenobrachius leucopsarus*) off Santa Barbara. 1990; 31. Available from: [https://calcofi.org/downloads/publications/calcofireports/v31/Vol\\_31\\_Cailliet\\_Ebeling.pdf](https://calcofi.org/downloads/publications/calcofireports/v31/Vol_31_Cailliet_Ebeling.pdf)
64. Percy WG, Krygier EE, Mesecar R, Ramsey F. Vertical distribution and migration of oceanic micro-nekton off Oregon. Deep-Sea Res Part 1 Oceanogr Res Pap. 1977; 24: 223–245. [https://doi.org/10.1016/S0146-6291\(77\)80002-7](https://doi.org/10.1016/S0146-6291(77)80002-7)
65. Matthews SA, Ohman MD. A space-for-time framework for forecasting the effects of ocean stratification on zooplankton vertical habitat use and trait composition. Limnol Oceanogr. 2023. <https://doi.org/10.1002/lno.12450>
66. Barnett AM, Jahn AE. Pattern and persistence of a nearshore planktonic ecosystem off Southern California. Cont Shelf Res. 1987; 7: 1–25. [https://doi.org/10.1016/0278-4343\(87\)90060-4](https://doi.org/10.1016/0278-4343(87)90060-4)
67. Fleminger A. Distributional atlas of calanoid copepods in the California current region, PT. II. State of California. Marine Research Committee; 1967
68. Peterson WT. Copepod species richness as an indicator of long-term changes in the coastal ecosystem of the northern California Current. CalCOFI Rep. 2009; 50. Available from: [https://calcofi.com/publications/calcofireports/v50/73-81\\_Peterson.pdf](https://calcofi.com/publications/calcofireports/v50/73-81_Peterson.pdf)
69. Siebert S, Pugh PR, Haddock SHD, Dunn CW. Re-evaluation of characters in Apolemiidae (Siphonophora), with description of two new species from Monterey Bay, California. Zootaxa. 2013; 3702: 201–232. <https://doi.org/10.11646/zootaxa.3702.3.1> PMID: 26146720
70. Damian-Serrano A, Hetherington ED, Choy CA, Haddock SHD, Lapidus A, Dunn CW. Characterizing the secret diets of siphonophores (Cnidaria: Hydrozoa) using DNA metabarcoding. PLoS One. 2022; 17: e0267761. <https://doi.org/10.1371/journal.pone.0267761> PMID: 35594271
71. Gold Z, Wall AR, Schweizer TM, Pentcheff ND, Curd EE, Barber PH, et al. A manager's guide to using eDNA metabarcoding in marine ecosystems. PeerJ. 2022; 10: e14071. <https://doi.org/10.7717/peerj.14071> PMID: 36405018
72. Wilson RP. The Jackass Penguin (*Spheniscus demersus*) as a pelagic predator. Mar Ecol Prog Ser. 1985; 25: 219–227. Available from: <http://www.jstor.org/stable/24817474>
73. Yates MC, Glaser DM, Post JR, Cristescu ME, Fraser DJ, Derry AM. The relationship between eDNA particle concentration and organism abundance in nature is strengthened by allometric scaling. Mol Ecol. 2021; 30: 3068–3082. <https://doi.org/10.1111/mec.15543> PMID: 32638451
74. Vereshchaka AL, Lunina AA, Sutton T. Assessing deep-pelagic shrimp biomass to 3000 m in the Atlantic Ocean and ramifications of upscaled global biomass. Sci Rep. 2019; 9: 5946. <https://doi.org/10.1038/s41598-019-42472-8> PMID: 30976092
75. Meyer CP, Paulay G. DNA barcoding: error rates based on comprehensive sampling. PLoS Biol. 2005; 3: e422. <https://doi.org/10.1371/journal.pbio.0030422> PMID: 16336051
76. Strugnell J, Nishiguchi MK. Molecular phylogeny of coleoid cephalopods (Mollusca: Cephalopoda) inferred from three mitochondrial and six nuclear loci: a comparison of alignment, implied alignment and analysis methods. J Molluscan Stud. 2007; 73: 399–410. <https://doi.org/10.1093/mollus/eym038>
77. Arafat H, Alamaru A, Gissi C, Huchon D. Extensive mitochondrial gene rearrangements in Ctenophora: insights from benthic Platyctenida. BMC Evol Biol. 2018; 18: 65. <https://doi.org/10.1186/s12862-018-1186-1> PMID: 29703131
78. Schultz DT, Eizenga JM, Corbett-Detig RB, Francis WR, Christianson LM, Haddock SHD. Conserved novel ORFs in the mitochondrial genome of the ctenophore *Beroë forskalii*. PeerJ. 2020; 8: e8356. <https://doi.org/10.7717/peerj.8356> PMID: 32025367
79. Folmer O, Black M, Hoeh W, Lutz R, Vrijenhoek R. DNA primers for amplification of mitochondrial cytochrome c oxidase subunit I from diverse metazoan invertebrates. Mol Mar Biol Biotechnol. 1994; 3: 294–299. Available from: <https://www.ncbi.nlm.nih.gov/pubmed/7881515> PMID: 7881515

80. Christianson LM, Johnson SB, Schultz DT, Haddock SHD. Hidden diversity of Ctenophora revealed by new mitochondrial COI primers and sequences. *Mol Ecol Resour.* 2022; 22: 283–294. <https://doi.org/10.1111/1755-0998.13459> PMID: 34224654
81. Löbl I, Klausnitzer B, Hartmann M, Krell F-T. The silent extinction of species and taxonomists—An appeal to science policymakers and legislators. *Diversity.* 2023; 15: 1053. <https://doi.org/10.3390/d15101053>
82. Pappalardo P, Collins AG, Pagenkopp Lohan KM, Hanson KM, Truskey SB, Jaeckle W, et al. The role of taxonomic expertise in interpretation of metabarcoding studies. *ICES J Mar Sci.* 2021; 78: 3397–3410. <https://doi.org/10.1093/icesjms/fsab082>
83. Gold Z, Curd EE, Goodwin KD, Choi ES, Frable BW, Thompson AR, et al. Improving metabarcoding taxonomic assignment: A case study of fishes in a large marine ecosystem. *Mol Ecol Resour.* 2021; 21: 2546–2564. <https://doi.org/10.1111/1755-0998.13450> PMID: 34235858
84. Lacoursière-Roussel A, Côté G, Leclerc V, Bernatchez L. Quantifying relative fish abundance with eDNA: a promising tool for fisheries management. *J Appl Ecol.* 2016; 53: 1148–1157. <https://doi.org/10.1111/1365-2664.12598>
85. Chabot D, Steffensen JF, Farrell AP. The determination of standard metabolic rate in fishes. *J Fish Biol.* 2016; 88: 81–121. <https://doi.org/10.1111/jfb.12845> PMID: 26768973
86. Torres JJ, Belman BW, Childress JJ. Oxygen consumption rates of midwater fishes as a function of depth of occurrence. *Deep-Sea Res Part A Oceanog Res Pap.* 1979; 26: 185–197. [https://doi.org/10.1016/0198-0149\(79\)90075-X](https://doi.org/10.1016/0198-0149(79)90075-X)
87. Childress JJ. The respiratory rates of midwater crustaceans as a function of depth of occurrence and relation to the oxygen minimum layer off Southern California. *Comp Biochem Physiol A Comp Physiol.* 1975; 50: 787–799. [https://doi.org/10.1016/0300-9629\(75\)90146-2](https://doi.org/10.1016/0300-9629(75)90146-2) PMID: 236141
88. Seibel BA, Thuesen EV, Childress JJ, Gorodezky LA. Decline in pelagic cephalopod metabolism with habitat depth reflects differences in locomotory efficiency. *Biol Bull.* 1997; 192: 262–278. <https://doi.org/10.2307/1542720> PMID: 28581868
89. Blanchet FG, Cazelles K, Gravel D. Co-occurrence is not evidence of ecological interactions. *Ecol Lett.* 2020; 23: 1050–1063. <https://doi.org/10.1111/ele.13525> PMID: 32429003
90. Leduc N, Lacoursière-Roussel A, Howland KL, Archambault P, Sevellec M, Normandeau E, et al. Comparing eDNA metabarcoding and species collection for documenting Arctic metazoan biodiversity. *Environ DNA.* 2019; 1: 342–358. <https://doi.org/10.1002/edn3.35>
91. Laroche O, Kersten O, Smith CR, Goetze E. From sea surface to seafloor: A benthic allochthonous eDNA survey for the abyssal ocean. *Front Mar Sci.* 2020; 7. <https://doi.org/10.3389/fmars.2020.00682>
92. Ruppert KM, Kline RJ, Rahman MS. Past, present, and future perspectives of environmental DNA (eDNA) metabarcoding: A systematic review in methods, monitoring, and applications of global eDNA. *Glob Ecol Conserv.* 2019; 17: e00547. <https://doi.org/10.1016/j.gecco.2019.e00547>
93. Blanco-Bercial L, Cornils A, Copley N, Bucklin A. DNA barcoding of marine copepods: assessment of analytical approaches to species identification. *PLoS Curr.* 2014; 6. Available from: <https://www.ncbi.nlm.nih.gov/pmc/articles/PMC4073882/> <https://doi.org/10.1371/currents.tol.cdf8b74881f87e3b01d56b43791626d2> PMID: 24987576
94. Andruszkiewicz EA, Starks HA, Chavez FP, Sassoubre LM, Block BA, Boehm AB. Biomonitoring of marine vertebrates in Monterey Bay using eDNA metabarcoding. *PLoS One.* 2017; 12: e0176343. <https://doi.org/10.1371/journal.pone.0176343> PMID: 28441466
95. Laroche O, Kersten O, Smith CR, Goetze E. Environmental DNA surveys detect distinct metazoan communities across abyssal plains and seamounts in the western Clarion Clipperton Zone. *Mol Ecol.* 2020; 29: 4588–4604. <https://doi.org/10.1111/mec.15484> PMID: 32452072
96. Weber ED, Auth TD, Baumann-Pickering S, Baumgartner TR, Bjorkstedt EP, Bograd SJ, et al. State of the California current 2019–2020: Back to the future with marine heatwaves? *Front Mar Sci.* 2021; 8. <https://doi.org/10.3389/fmars.2021.709454>
97. Thompson AR, Bjorkstedt EP, Bograd SJ, Fisher JL, Hazen EL, Leising A, et al. State of the California Current Ecosystem in 2021: Winter is coming? *Front Mar Sci.* 2022; 9. <https://doi.org/10.3389/fmars.2022.958727>
98. Thompson AR, Harvey CJ, Sydeman WJ, Barceló C, Bograd SJ, Brodeur RD, et al. Indicators of pelagic forage community shifts in the California Current Large Marine Ecosystem, 1998–2016. *Ecol Indic.* 2019; 105: 215–228. <https://doi.org/10.1016/j.ecolind.2019.05.057>
99. Blattner L, Ebner JN, Zopfi J, von Fumetti S. Targeted non-invasive bioindicator species detection in eDNA water samples to assess and monitor the integrity of vulnerable alpine freshwater environments. *Ecol Indic.* 2021; 129: 107916. <https://doi.org/10.1016/j.ecolind.2021.107916>

100. Preston C, Yamahara K, Pargett D, Weinstock C, Birch J, Roman B, et al. Autonomous eDNA collection using an uncrewed surface vessel over a 4200-km transect of the eastern Pacific Ocean. *Environ DNA*. 2023. <https://doi.org/10.1002/edn3.468>
101. Das J, Trembath-Reichert E. Deep diving with Clio. *Sci Robot*. 2020; 5. <https://doi.org/10.1126/scirobotics.abf1499> PMID: 33239323
102. Yamahara KM, Preston CM, Birch J, Walz K, Marin R III, Jensen S, et al. In situ autonomous acquisition and preservation of marine environmental DNA using an autonomous underwater vehicle. *Front Mar Sci*. 2019; 6. <https://doi.org/10.3389/fmars.2019.00373>
103. Singer GAC, Fahner NA, Barnes JG, McCarthy A, Hajibabaei M. Comprehensive biodiversity analysis via ultra-deep patterned flow cell technology: a case study of eDNA metabarcoding seawater. *Sci Rep*. 2019; 9: 5991. <https://doi.org/10.1038/s41598-019-42455-9> PMID: 30979963
104. Bracken H, Toon A, Felder D, Martin J, Finley M, Rasmussen J, et al. The decapod tree of life: compiling the data and moving toward a consensus of decapod evolution. *Arthropod Syst Phylogeny*. 2009; 67: 99–116. Available from: <https://arthropod-systematics.arphahub.com/article/31691/download/pdf/>
105. Djurhuus A, Pitz K, Sawaya NA, Rojas-Márquez J, Michaud B, Montes E, et al. Evaluation of marine zooplankton community structure through environmental DNA metabarcoding. *Limnol Oceanogr Methods*. 2018; 16: 209–221. <https://doi.org/10.1002/lom3.10237> PMID: 29937700
106. Aceves-Medina G, Jiménez-Rosenberg SPA, Durazo R. Fish larvae as indicator species of interannual environmental variability in a subtropical transition area off the Baja California peninsula. *Deep-Sea Res Part 2 Top Stud Oceanogr*. 2019; 169–170: 104631. <https://doi.org/10.1016/j.dsr2.2019.07.019>
107. Marques SC, Azeiteiro UM, Leandro SM, Queiroga H, Primo AL, Martinho F, et al. Predicting zooplankton response to environmental changes in a temperate estuarine ecosystem. *Mar Biol*. 2008; 155: 531–541. <https://doi.org/10.1007/s00227-008-1052-6>
